# Supplementary material for: Multiple forest attributes underpin the supply of multiple ecosystem services
Source: Springer Nature journal article supplement (doi:10.1038/s41467-018-07082-4), 2018-11-12
Supplement: MOESM1 [file 41467_2018_7082_MOESM1_ESM.pdf › 41467_2018_7082_MOESM1_ESM.pdf]

# Multiple forest attributes underpin the provision of multiple ecosystem services

Felipe-Lucia et al.

## Supplementary Information: list of material provided

**Supplementary Figure 1.** Relationship between forest attributes and forest management types: managed conifer forests (M\_C), managed broadleaved forests (M\_B), and unmanaged broadleaved forests (U\_B).

**Supplementary Figure 2.** Relationship between ecosystem services and forest management types: managed conifer forests (M\_C), managed broadleaved forests (M\_B), and unmanaged broadleaved forests (U\_B).

**Supplementary Figure 3.** Pairwise Spearman correlations among all potential drivers of ecosystem services considered for the analyses (i.e. the initial 21 forest attributes plus the four environmental factors).

**Supplementary Figure 4.** Change in Pearson correlations between ecosystem services due to a) the effect of environmental factors (E – All factors) and b) the effect of forest attributes (F – All factors).

**Supplementary Figure 5.** Significant effects found in simplified models (see Fig. 3 and Supplementary Table 6) plotted using unscaled data.

**Supplementary Table 1.** Description of the environmental factors and the forest attributes measured for 150 forest plots.

**Supplementary Table 2.** Description of the ecosystem service proxies assessed for 150 forest plots, including their category according to MEA (2005), units, year of collection, and sample size (N).

**Supplementary Table 3.** a) Variance partitioning of ecosystem services using multiple  $R^2$ . b) Variance partitioning of ecosystem services using adjusted  $R^2$ . c) AICc of the models used for the variance partitioning analyses.

**Supplementary Table 4.** a) Tests for Pearson correlation matrices comparison between ecosystem services including all factors and after subsequently removing the effects of environmental factors (E) and forest attributes (E+F). b) Tests to assess the effect of particular sets of ecosystem services in the matrices comparison.

**Supplementary Table 5.** Estimated overall effects of forest attributes on ecosystem services obtained from full linear models.

**Supplementary Table 6.** Estimated effects of 12 forest attributes on 14 ecosystem services obtained from simplified linear models.

**Supplementary Table 7.** a) Comparison of the effects of conifer species identity in full linear models. b) Comparison of the effects of broadleaved species identity in full linear models. c) Comparison of the effects removing overlapping species for wild edible plant species and shrubs richness and evenness in simplified models. d) Comparison of the effects removing overlapping species for wild edible plant species and shrubs richness and evenness in full models.

**Supplementary Table 8.**  $R^2$ , adjusted  $R^2$ , F-statistics and degrees of freedom (DF) for each of the 14 ecosystem service models.

**Supplementary Table 9.** List of edible fungi species identified in the 150 forest plots.

**Supplementary Table 10.** List of wild edible plants species for potential gathering found in the 150 forest plots and their average percentage of cover across plots.

**Supplementary Table 11.** List of plant species of special interest (i.e. of cultural value) found in the 150 forest plots and their average percentage of cover across plots.

**Supplementary Methods.**

**Supplementary References.**

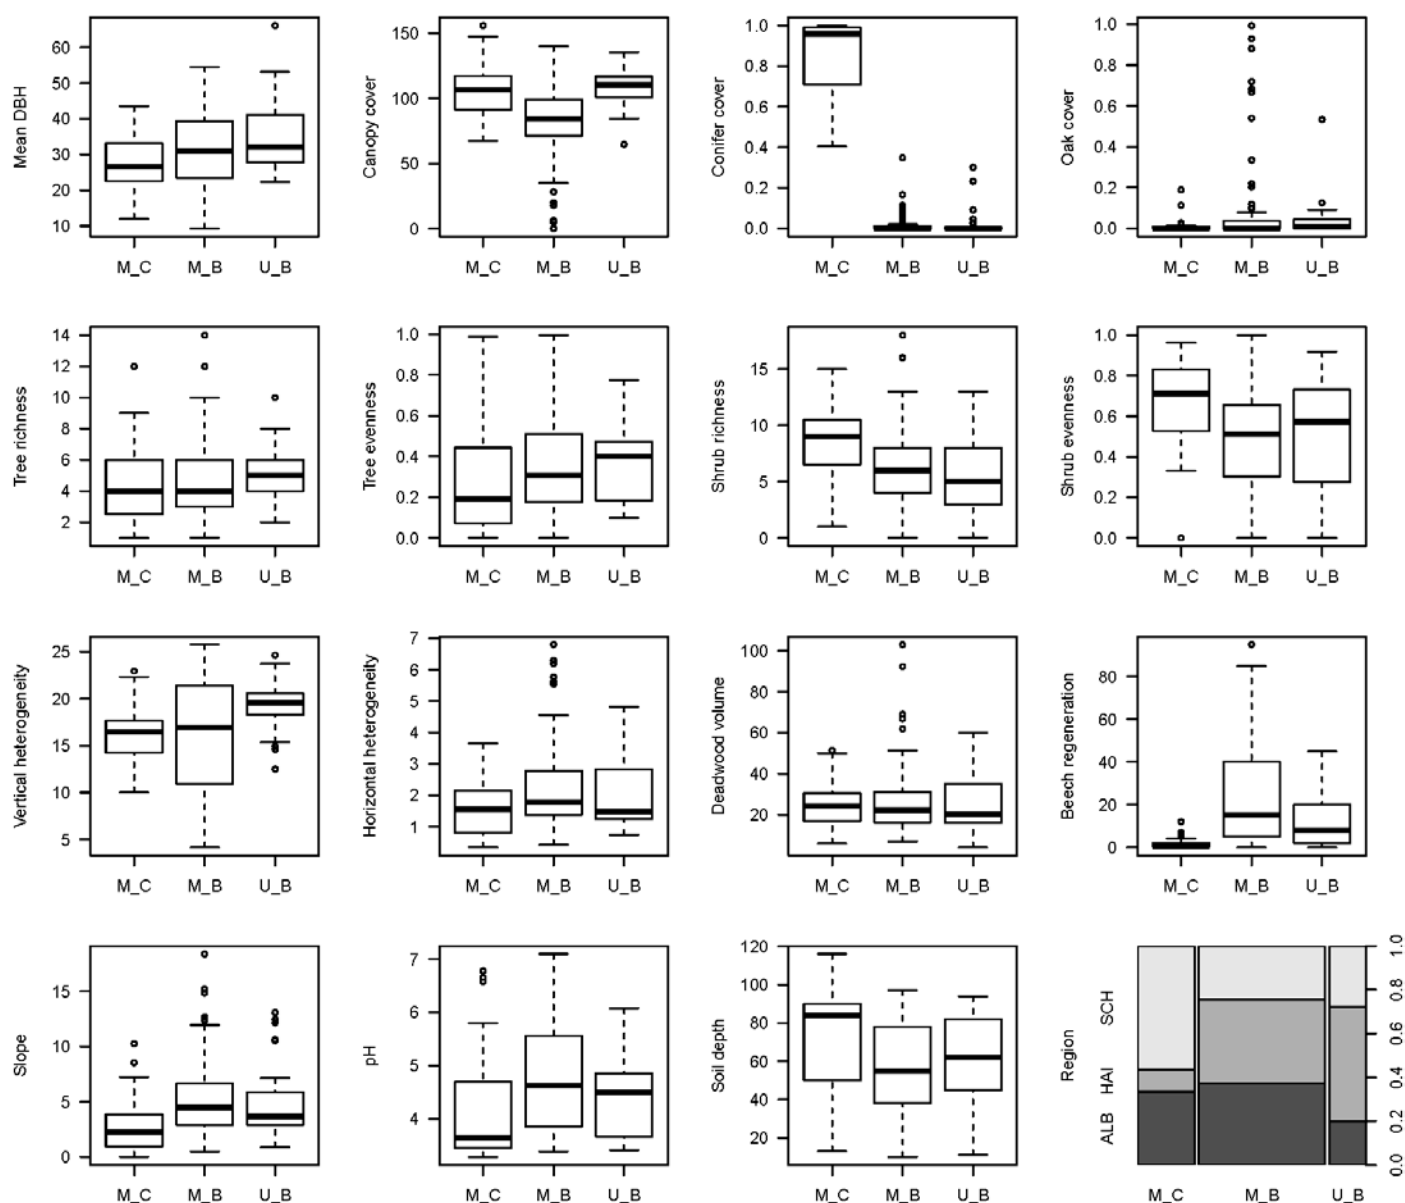

**Supplementary Figure 1. Relationship between forest attributes and forest management types: managed conifer forests (M\_C), managed broadleaved forests (M\_B), and unmanaged broadleaved forests (U\_B). Region: ALB (Schwäbische Alb), HAI (Hainich-Dün), SCH (Schorfheide-Chorin). Units as Supplementary Table 1 except for Region that shows proportions.**

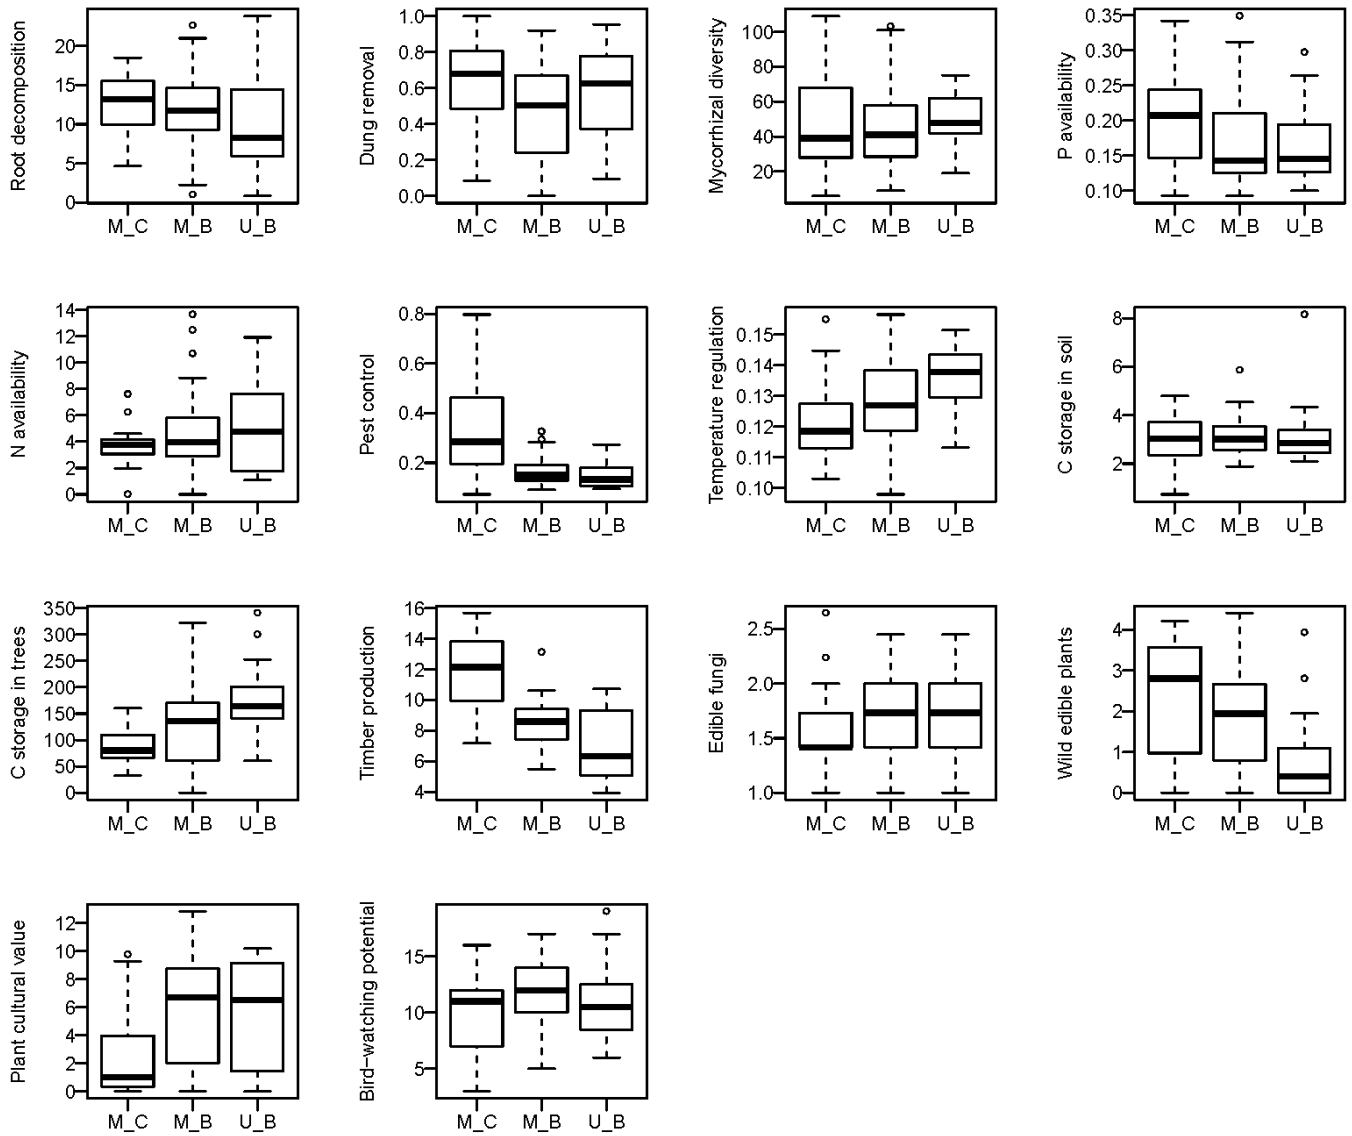

**Supplementary Figure 2. Relationship between ecosystem services and forest management types: managed conifer forests (M\_C), managed broadleaved forests (M\_B), and unmanaged broadleaved forests (U\_B). Units as Supplementary Table 2.**

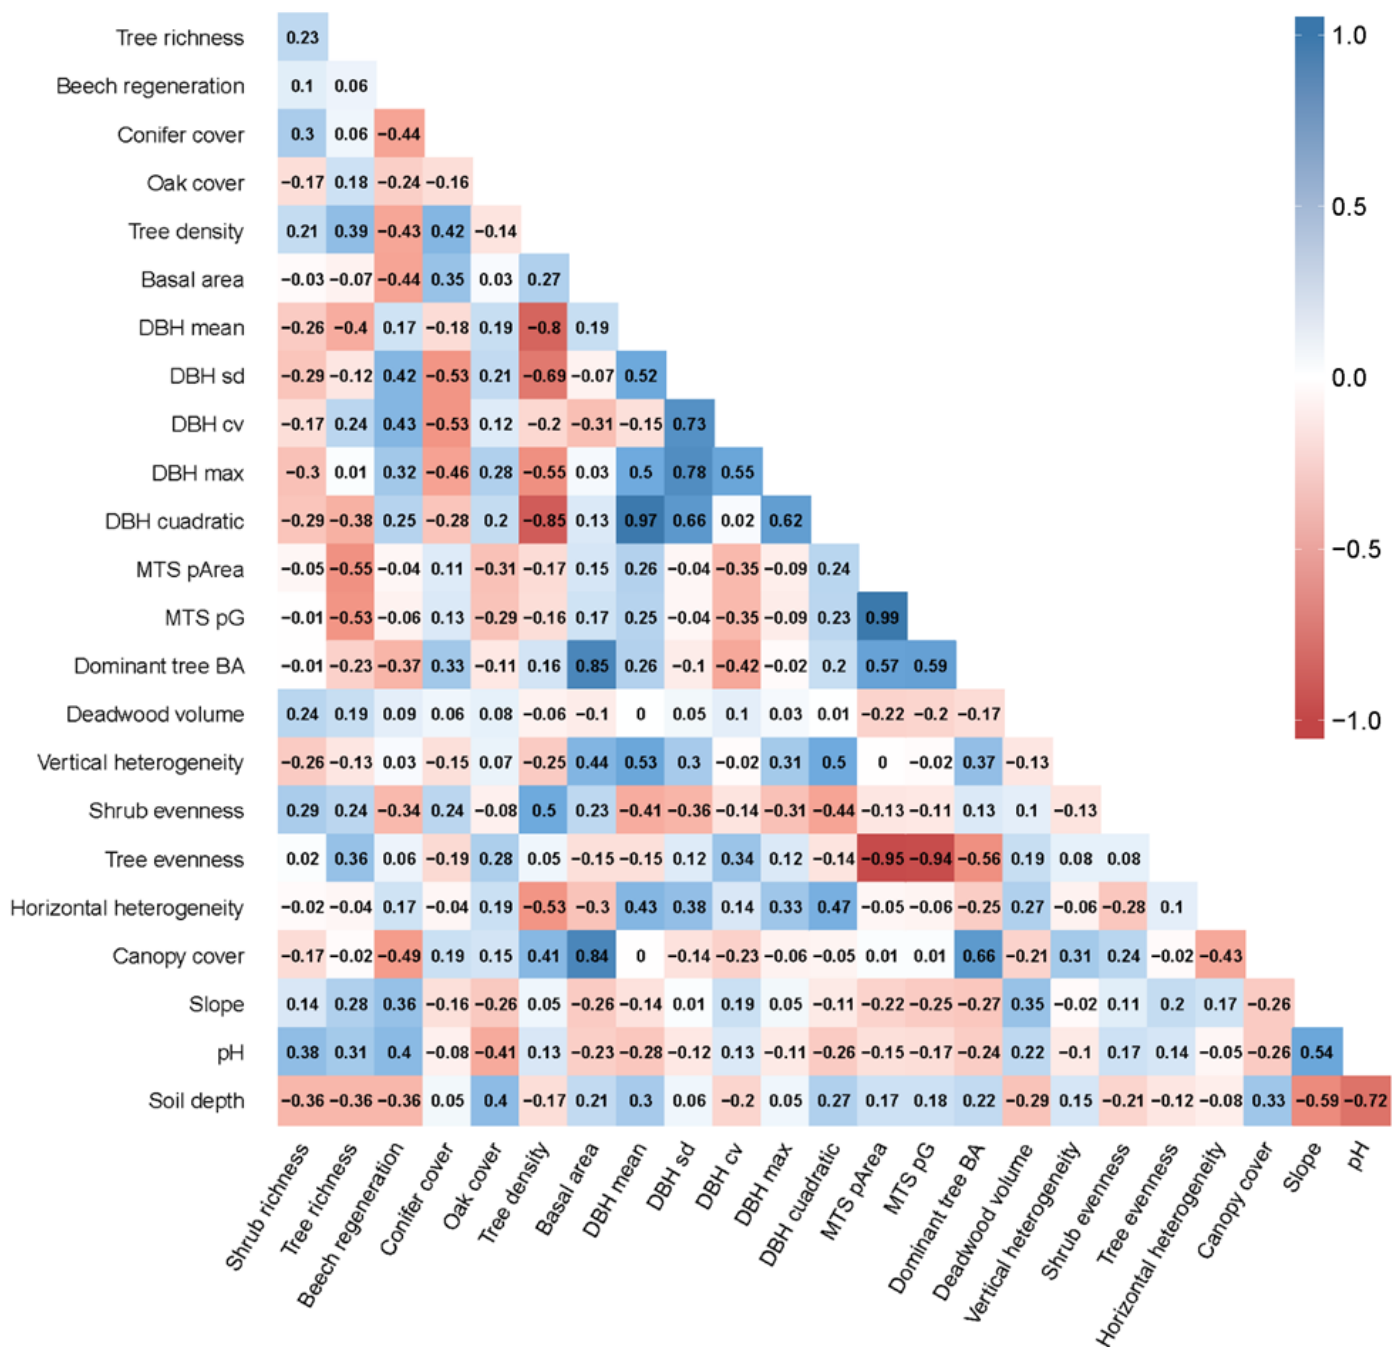

**Supplementary Figure 3. Pairwise Spearman correlations among all potential drivers of ecosystem services considered for the analyses (i.e. the initial 21 forest attributes plus the four environmental factors).** See Supplementary Table 1 for a description of the variables.

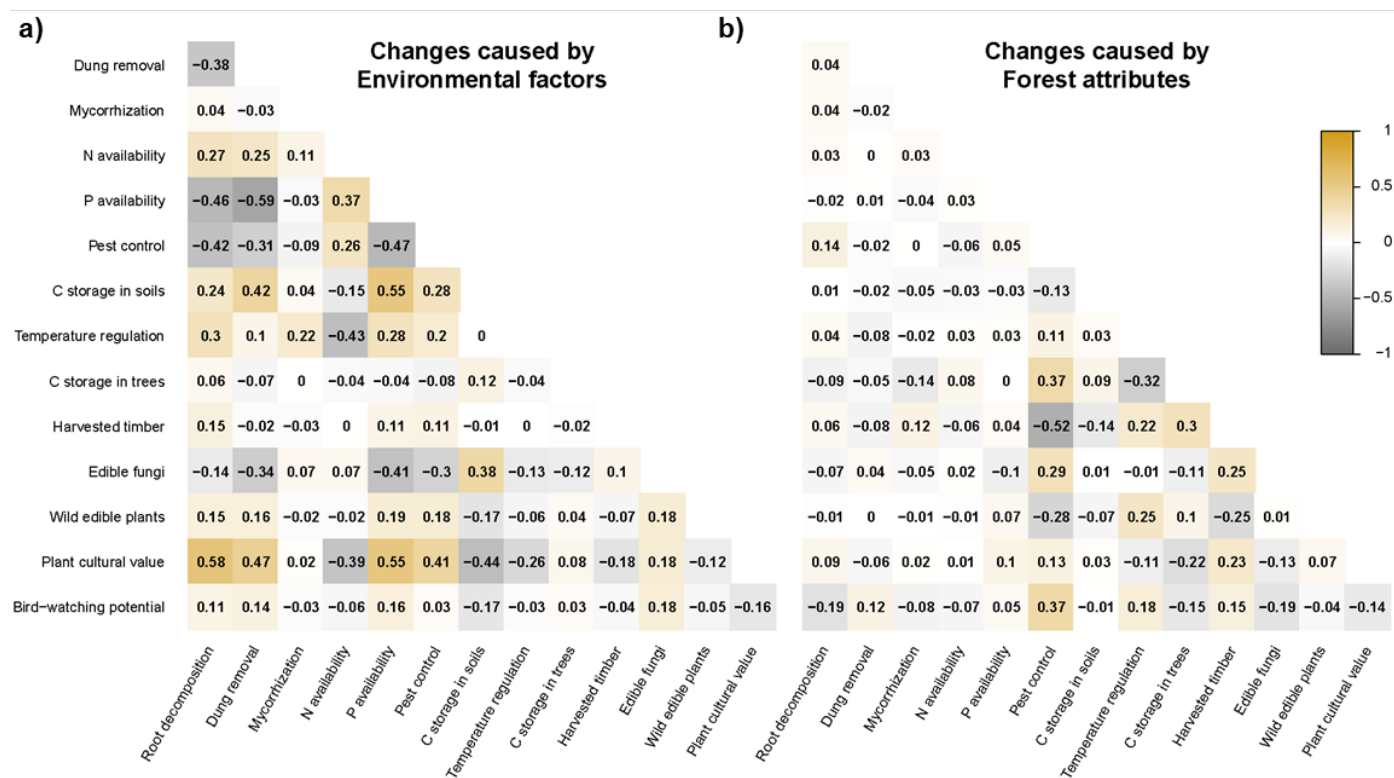

**Supplementary Figure 4. Change in Pearson correlations between ecosystem services due to a) the effect of environmental factors (E – All factors) and b) the effect of forest attributes (F – All factors).**

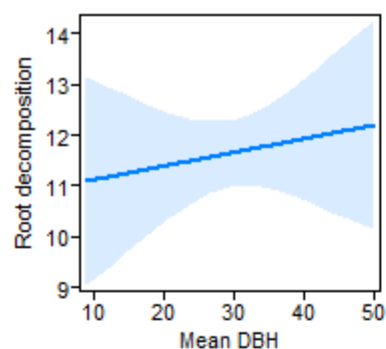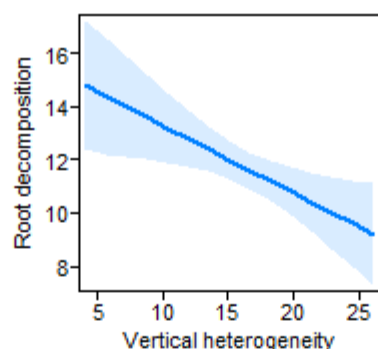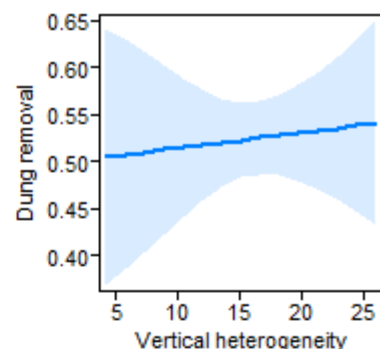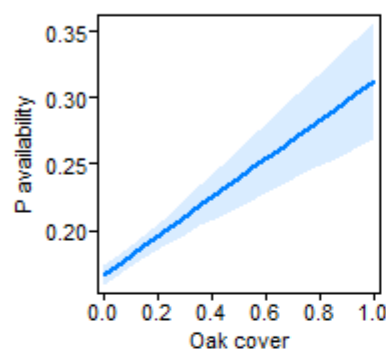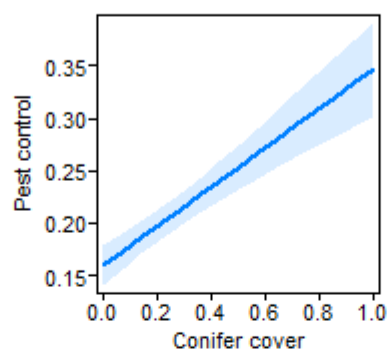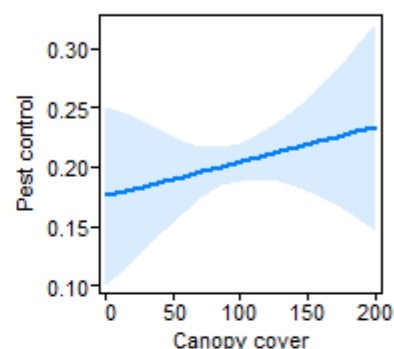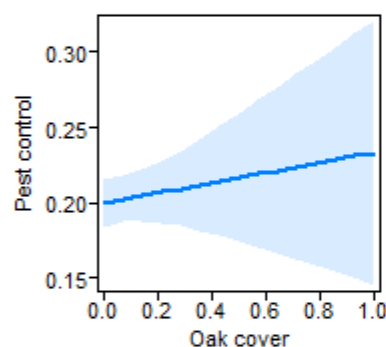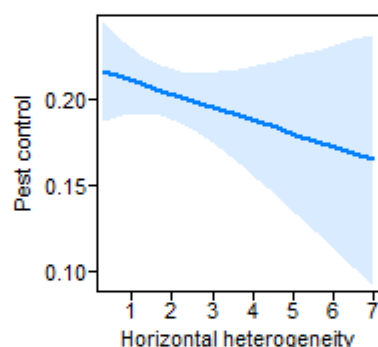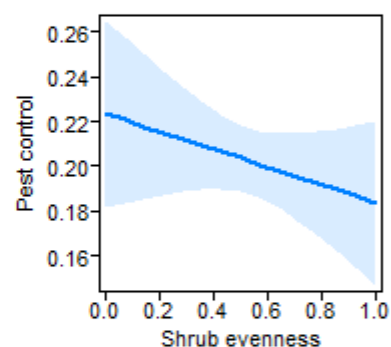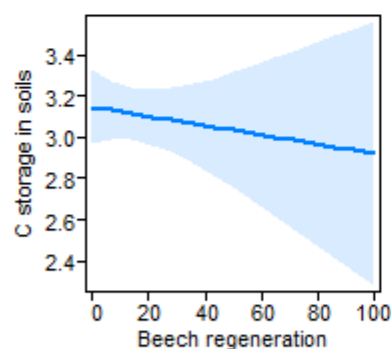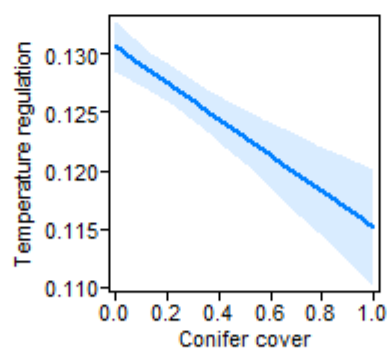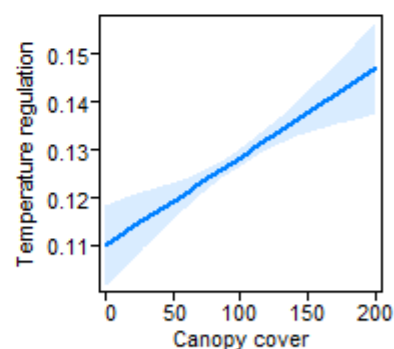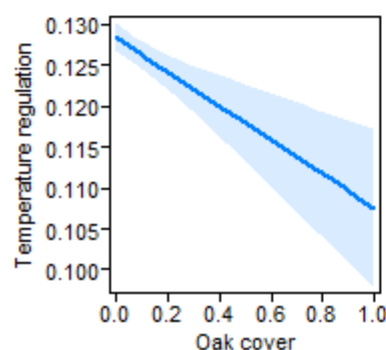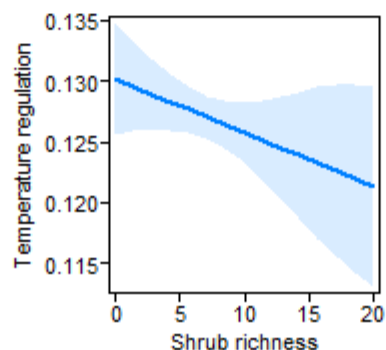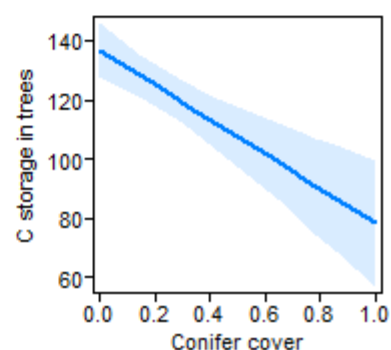

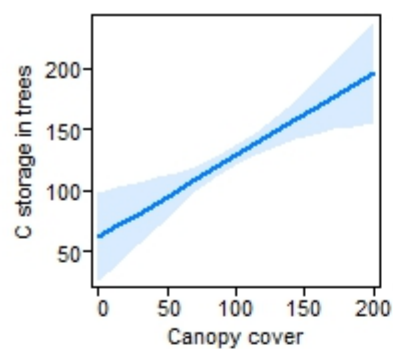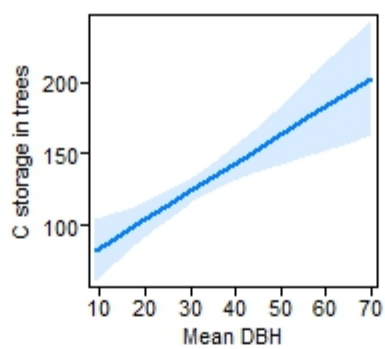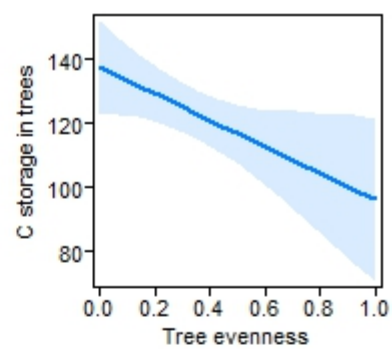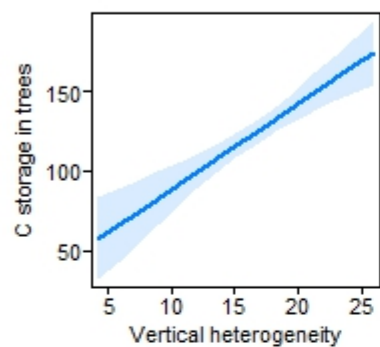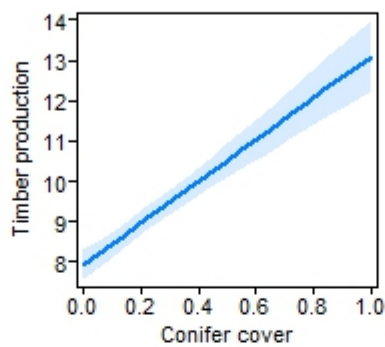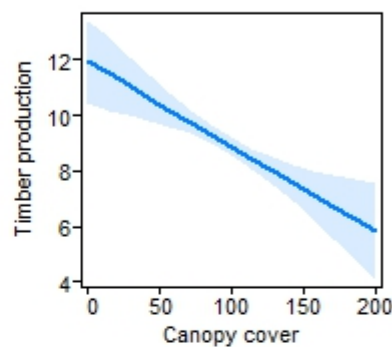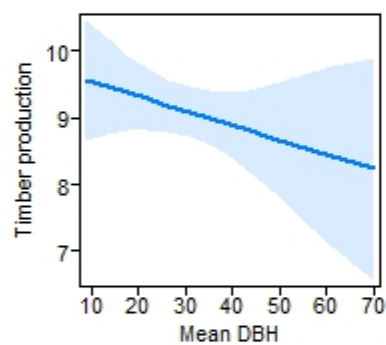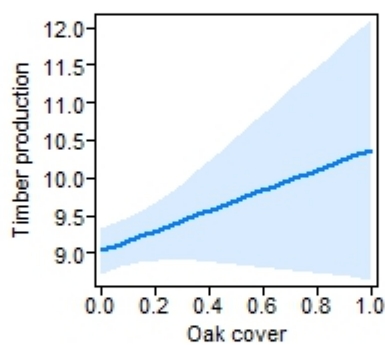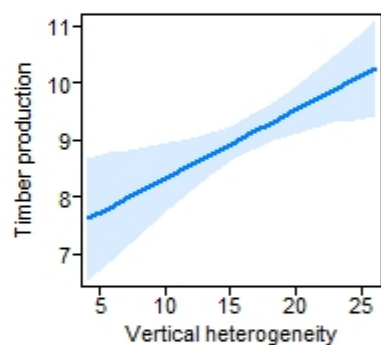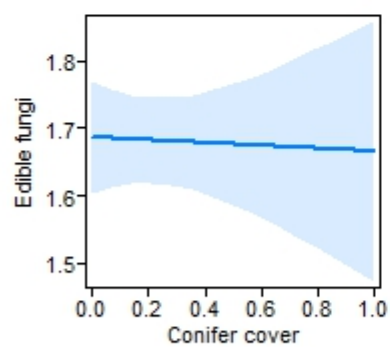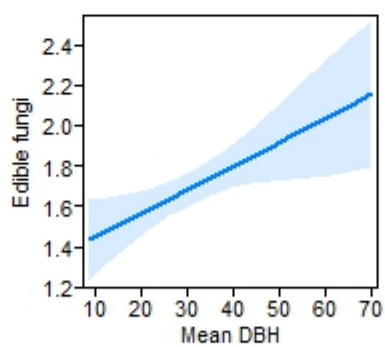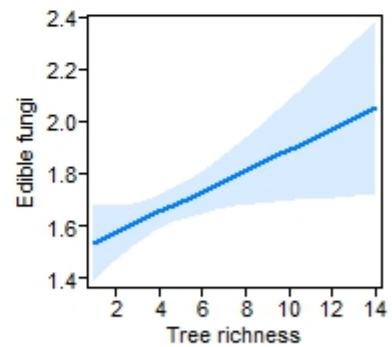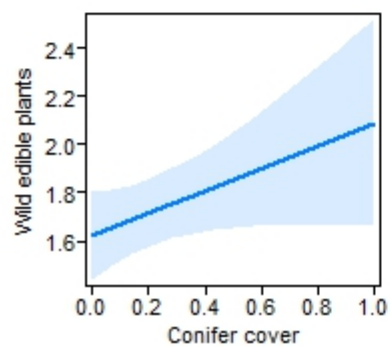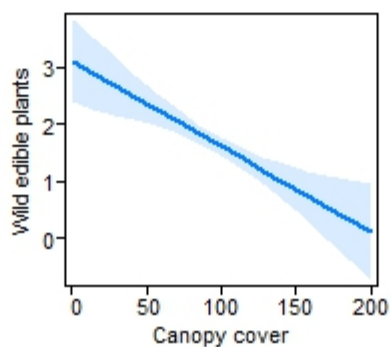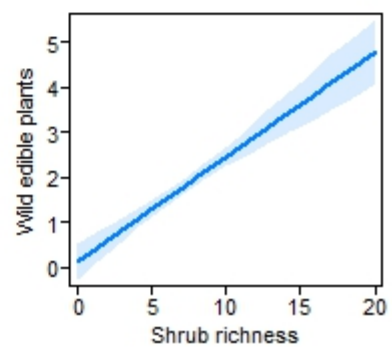



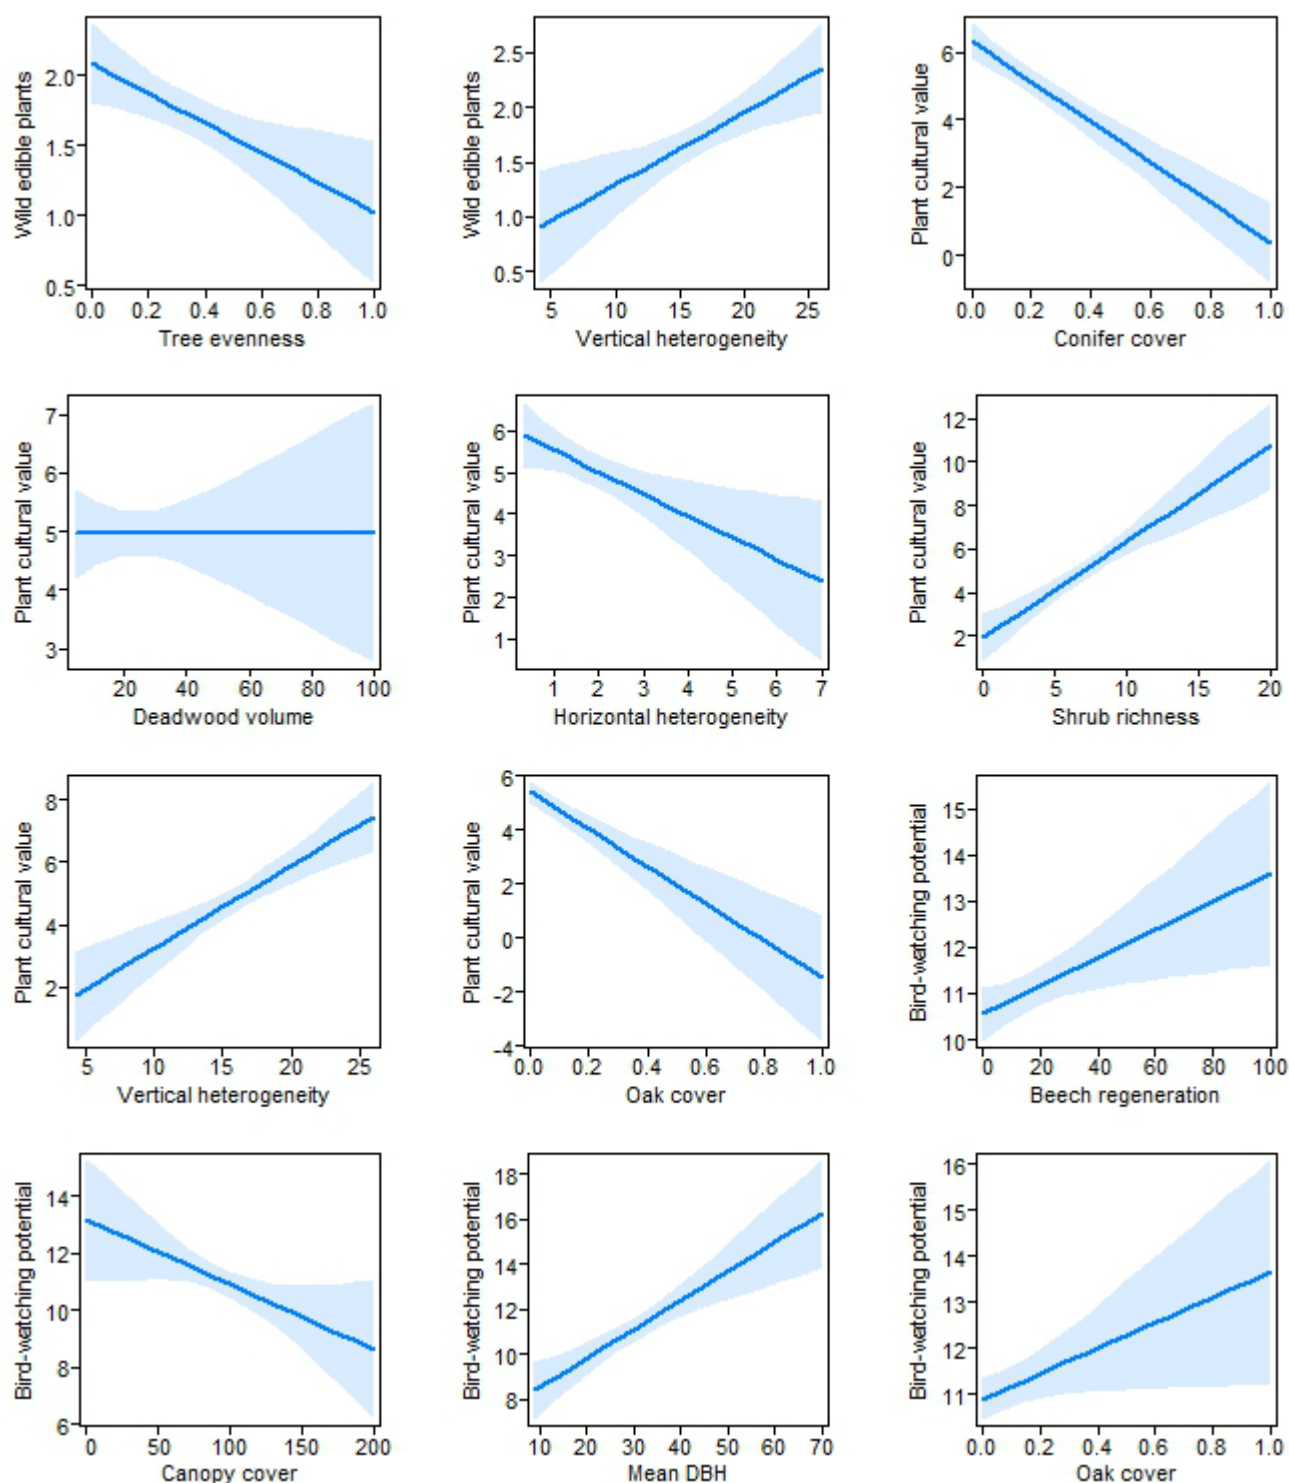

**Supplementary Figure 5. Significant effects found in simplified models (see Fig. 3 and Supplementary Table 6) plotted using unscaled data.** See Supplementary Table 1 for a description of the forest attributes and Supplementary Table 2 for a description of the ecosystem services.

**Supplementary Table 1. Description of the environmental factors and the forest attributes measured for 150 forest plots.** (DBH: diameter at breast height).

|                                           | Variable                 | Description                                                                                                                                                                                                 | Units                                |
|-------------------------------------------|--------------------------|-------------------------------------------------------------------------------------------------------------------------------------------------------------------------------------------------------------|--------------------------------------|
| Environment                               | Location                 | Biodiversity Exploratory site                                                                                                                                                                               | Unitless                             |
|                                           | Slope                    | Average slope of each plot, based on DTM.                                                                                                                                                                   | Degrees                              |
|                                           | Soil depth               | Thickness of the mineral soil layer.                                                                                                                                                                        | cm                                   |
|                                           | Soil pH                  | pH measurement of the mineral soil (0-10 cm).                                                                                                                                                               | Unitless                             |
| Structure                                 | Canopy cover             | Percentage of the plot covered by the projected tree (DBH >7 cm) crown.                                                                                                                                     | %                                    |
|                                           | Mean DBH                 | Mean tree (DBH >7 cm) DBH.                                                                                                                                                                                  | cm                                   |
| Composition                               | Conifer cover            | Proportion of non-native or planted conifer species ( <i>Abies alba</i> , <i>Larix sp.</i> , <i>Picea abies</i> , <i>Pinus sylvestris</i> , <i>Pseudotsuga menziesii</i> ) on total tree (DBH >7 cm) cover. | %                                    |
|                                           | Oak cover                | Proportion of <i>Quercus</i> species on total tree (DBH >7 cm) cover.                                                                                                                                       | %                                    |
| Heterogeneity                             | Vertical heterogeneity   | Number of layers in the vertical axis.                                                                                                                                                                      | Number of layers                     |
|                                           | Horizontal heterogeneity | Standard deviation of canopy height, related to the stand patchiness.                                                                                                                                       | m <sup>2</sup> ha <sup>-1</sup>      |
| Diversity                                 | Tree richness            | Richness of tree species (DBH >7 cm).                                                                                                                                                                       | Number of species                    |
|                                           | Tree evenness            | Evenness of tree species (DBH >7 cm).                                                                                                                                                                       | Evenness of species                  |
|                                           | Shrubs richness          | Richness of the woody vegetation (<5 m).                                                                                                                                                                    | Number of species                    |
|                                           | Shrubs evenness          | Evenness of the woody vegetation (<5 m).                                                                                                                                                                    | Evenness of species                  |
| Regeneration                              | Beech regeneration       | Cover of beech <5m.                                                                                                                                                                                         | %                                    |
| Deadwood                                  | Deadwood volume          | Total deadwood volume, indicates habitat availability for wood decomposers.                                                                                                                                 | m <sup>3</sup> ha <sup>-1</sup>      |
| Additional variables initially considered | <i>Tree density</i>      | <i>Number of trees (DBH &gt;7 cm).</i>                                                                                                                                                                      | <i>trees ha<sup>-1</sup></i>         |
|                                           | <i>Basal area</i>        | <i>Total area covered by tree (DBH &gt;7 cm) stems.</i>                                                                                                                                                     | <i>m<sup>2</sup> ha<sup>-1</sup></i> |
|                                           | <i>DBH sd</i>            | <i>Standard deviation of tree (DBH &gt;7 cm) DBH.</i>                                                                                                                                                       | <i>cm</i>                            |
|                                           | <i>DBH cv</i>            | <i>Coefficient of variation tree (DBH &gt;7 cm) DBH.</i>                                                                                                                                                    | <i>%</i>                             |
|                                           | <i>DBH max</i>           | <i>Maximum tree (DBH &gt;7 cm) DBH.</i>                                                                                                                                                                     | <i>cm</i>                            |
|                                           | <i>DBH cuadratic</i>     | <i>Quadratic mean tree (DBH &gt;7 cm) DBH.</i>                                                                                                                                                              | <i>cm</i>                            |
|                                           | <i>MTS pArea</i>         | <i>Proportion of the dominant tree species (DBH &gt;7 cm) on covered ground area.</i>                                                                                                                       | <i>%</i>                             |
|                                           | <i>MTS pG</i>            | <i>Proportion of the dominant tree species (DBH &gt;7 cm) on total basal area.</i>                                                                                                                          | <i>%</i>                             |
|                                           | <i>Dominant tree BA</i>  | <i>Total area covered by stems of the dominant tree species (DBH &gt;7 cm).</i>                                                                                                                             | <i>m<sup>2</sup> ha<sup>-1</sup></i> |

**Supplementary Table 2. Description of the ecosystem service proxies assessed for 150 forest plots, including their category according to MEA (2005), units, year of collection, and sample size (N). (OTU: operational taxonomic unit).**

| Category     | Variable                | Description                                                                                          | Units                                                   | Year | N   |
|--------------|-------------------------|------------------------------------------------------------------------------------------------------|---------------------------------------------------------|------|-----|
| Supporting   | Root decomposition      | Root litter mass loss rate                                                                           | %                                                       | 2012 | 135 |
|              | Dung removal            | Dung removal rate                                                                                    | %                                                       | 2014 | 150 |
|              | Mycorrhizal diversity   | Richness of mycorrhizal OTU                                                                          | Number of OTU                                           | 2011 | 111 |
|              | P availability          | Content of extractable phosphorus in soil                                                            | g P kg <sup>-1</sup> soil                               | 2014 | 150 |
|              | N availability          | Potential nitrification ratio (Predators + Parasitoids) / (Bark beetles)                             | ng NO <sub>2</sub> g <sup>-1</sup> soil h <sup>-1</sup> | 2014 | 149 |
| Regulating   | Pest control            |                                                                                                      | Unitless                                                | 2010 | 149 |
|              | Temperature regulation  | Temperature diurnal range                                                                            | °C <sup>-1</sup>                                        | 2011 | 150 |
|              | C storage in soil       | Carbon stock in topsoil                                                                              | kg C m <sup>-2</sup> soil                               | 2014 | 145 |
|              | C storage in trees      | Carbon stored in trees                                                                               | kg C m <sup>-2</sup>                                    | 2012 | 150 |
| Provisioning |                         | Mean annual increment in wood volume (Periodic annual increment for uneven-aged and managed forests) | m <sup>3</sup> ha <sup>-1</sup> a <sup>-1</sup>         | 2016 | 150 |
|              | Edible fungi            | Richness of edible fungi                                                                             | Number of species                                       | 2011 | 143 |
| Cultural     | Wild edible plants      | Cover of species for plant gathering                                                                 | %                                                       | 2011 | 150 |
|              | Plant cultural value    | Cover of plants of cultural interest                                                                 | %                                                       | 2011 | 150 |
|              | Bird-watching potential | Richness of birds                                                                                    | Number of species                                       | 2011 | 148 |

**Supplementary Table 3. a) Variance partitioning of ecosystem services using multiple  $R^2$ .** The three first columns are the  $R^2$  of models including only environmental variables (E), those with only forest attributes (F), and the full models (E + F). The next three columns are the exclusive effects of the environmental variables, the forest attributes, and the shared variances between both. The last column is the unexplained variance for each ecosystem service modeled. The average variance explained across all ecosystem services (ES) is also given.

| Ecosystem services      | $R^2$ E      | $R^2$ F      | $R^2$ E + F  | Exclusive E  | Exclusive F  | Shared E + F | Unexplained  |
|-------------------------|--------------|--------------|--------------|--------------|--------------|--------------|--------------|
| Root decomposition      | 0.513        | 0.319        | 0.554        | 0.235        | 0.041        | 0.279        | 0.446        |
| Dung removal            | 0.539        | 0.327        | 0.571        | 0.244        | 0.031        | 0.296        | 0.429        |
| P availability          | 0.690        | 0.522        | 0.745        | 0.223        | 0.055        | 0.467        | 0.255        |
| N availability          | 0.625        | 0.277        | 0.656        | 0.379        | 0.032        | 0.245        | 0.344        |
| Mycorrhizal diversity   | 0.101        | 0.166        | 0.206        | 0.040        | 0.105        | 0.061        | 0.794        |
| Pest control            | 0.357        | 0.488        | 0.701        | 0.214        | 0.344        | 0.143        | 0.299        |
| Temperature regulation  | 0.382        | 0.496        | 0.673        | 0.177        | 0.291        | 0.205        | 0.327        |
| C storage in soil       | 0.485        | 0.277        | 0.528        | 0.251        | 0.043        | 0.235        | 0.472        |
| C storage in trees      | 0.098        | 0.678        | 0.691        | 0.013        | 0.593        | 0.085        | 0.309        |
| Timber production       | 0.193        | 0.536        | 0.621        | 0.084        | 0.428        | 0.109        | 0.379        |
| Edible fungi            | 0.363        | 0.295        | 0.554        | 0.259        | 0.191        | 0.103        | 0.446        |
| Wild edible plants      | 0.143        | 0.595        | 0.600        | 0.005        | 0.457        | 0.138        | 0.400        |
| Plant cultural value    | 0.646        | 0.620        | 0.774        | 0.153        | 0.128        | 0.492        | 0.226        |
| Bird-watching potential | 0.040        | 0.408        | 0.445        | 0.037        | 0.405        | 0.003        | 0.555        |
| <i>Average all ES</i>   | <i>0.370</i> | <i>0.429</i> | <i>0.594</i> | <i>0.165</i> | <i>0.225</i> | <i>0.204</i> | <i>0.406</i> |

**b) Variance partitioning of ecosystem services using adjusted  $R^2$ .** The three first columns are the adjusted  $R^2$  of models including only environmental variables (E), those with only forest attributes (F), and the full models (E + F). The next three columns are the exclusive effects of E, F, and the shared variances between both (E + F). The last column is the unexplained variance for each ecosystem service modeled. The average variance explained across all ecosystem services (ES) is also given.

| Ecosystem services      | Adjusted $R^2$ E | Adjusted $R^2$ F | Adjusted $R^2$ E + F | Exclusive E  | Exclusive F  | Shared E + F | Unexplained  |
|-------------------------|------------------|------------------|----------------------|--------------|--------------|--------------|--------------|
| Root decomposition      | 0.494            | 0.251            | 0.488                | 0.237        | -0.006       | 0.258        | 0.512        |
| Dung removal            | 0.523            | 0.267            | 0.514                | 0.248        | -0.009       | 0.276        | 0.486        |
| P availability          | 0.679            | 0.480            | 0.712                | 0.232        | 0.033        | 0.447        | 0.288        |
| N availability          | 0.611            | 0.212            | 0.610                | 0.399        | -0.001       | 0.212        | 0.390        |
| Mycorrhizal diversity   | 0.058            | 0.062            | 0.058                | -0.004       | 0.000        | 0.062        | 0.942        |
| Pest control            | 0.334            | 0.442            | 0.662                | 0.220        | 0.328        | 0.114        | 0.338        |
| Temperature regulation  | 0.360            | 0.451            | 0.630                | 0.179        | 0.270        | 0.181        | 0.370        |
| C storage in soil       | 0.467            | 0.211            | 0.464                | 0.253        | -0.003       | 0.214        | 0.536        |
| C storage in trees      | 0.067            | 0.649            | 0.651                | 0.001        | 0.584        | 0.065        | 0.349        |
| Harvested timber        | 0.165            | 0.495            | 0.571                | 0.076        | 0.406        | 0.089        | 0.429        |
| Edible fungi            | 0.339            | 0.229            | 0.492                | 0.264        | 0.153        | 0.076        | 0.508        |
| Wild edible plants      | 0.114            | 0.559            | 0.548                | -0.011       | 0.434        | 0.125        | 0.452        |
| Plant cultural value    | 0.633            | 0.587            | 0.744                | 0.158        | 0.111        | 0.476        | 0.256        |
| Bird-watching potential | 0.006            | 0.355            | 0.372                | 0.017        | 0.366        | -0.011       | 0.628        |
| <i>Average all ES</i>   | <i>0.346</i>     | <i>0.375</i>     | <i>0.537</i>         | <i>0.162</i> | <i>0.190</i> | <i>0.185</i> | <i>0.463</i> |

**c) AICc of the models used for the variance partitioning analyses.** The three first columns are the AICc of the models including only environmental variables (E), those with only forest attributes (F), and the full models (E + F). The AICc of a null model is also given for comparison. The smallest AICc for each model is highlighted in bold.

|                         | <b>AICc E</b>  | <b>AICc F</b>  | <b>AICc E+F</b> | <b>AICc Null</b> |
|-------------------------|----------------|----------------|-----------------|------------------|
| Root decomposition      | <b>299.844</b> | 358.379        | 315.368         | 386.201          |
| Dung removal            | <b>323.159</b> | 391.254        | 337.447         | 428.760          |
| Mycorrhizal diversity   | <b>317.271</b> | 322.556        | 331.218         | 318.111          |
| N availability          | <b>286.959</b> | 396.620        | 301.638         | 420.248          |
| P availability          | 263.785        | 341.848        | <b>261.447</b>  | 428.760          |
| Pest control            | 370.892        | 323.253        | <b>256.796</b>  | 425.923          |
| C storage in soils      | <b>328.970</b> | 389.567        | 341.570         | 414.573          |
| Temperature regulation  | 367.374        | 349.768        | <b>298.632</b>  | 428.760          |
| C storage in trees      | 423.983        | <b>282.821</b> | 289.399         | 428.760          |
| Timber production       | 407.303        | 337.936        | <b>320.950</b>  | 428.760          |
| Edible fungi            | 355.241        | 380.733        | <b>329.110</b>  | 408.899          |
| Wild edible plants      | 416.256        | <b>314.510</b> | 325.412         | 428.760          |
| Plant cultural value    | 283.883        | 306.326        | <b>242.537</b>  | 428.760          |
| Bird-watching potential | 427.750        | <b>362.568</b> | 365.865         | 423.085          |

**Supplementary Table 4. a) Tests for Pearson correlation matrices comparison between ecosystem services including all factors and after subsequently removing the effects of environmental factors (E) and forest attributes (E+F).** The first column is the comparison test, the next three columns correspond to the unscaled Chi-square ( $\chi^2$ ) test statistic, and the next three give the Comparative Fit Index (CFI), Tucker-Lewis Index (TLI) and McDonald Measure of Centrality (Mc). Significant differences in  $\chi^2$ , CFI and TLI values below 0.95, and Mc values below 0.90 indicate significant differences between matrices. See Methods for details.

| Comparison         | $\chi^2$ diff | DF | Pr(> $\chi^2$ ) | CFI   | TLI   | Mc    |
|--------------------|---------------|----|-----------------|-------|-------|-------|
| E vs All factors   | 138.411       | 91 | 0.001           | 0.942 | 0.884 | 0.924 |
| E+F vs All factors | 228.351       | 91 | 0.000           | 0.804 | 0.608 | 0.795 |
| E+F vs E           | 98.013        | 91 | 0.289           | 0.975 | 0.949 | 0.988 |

**b) Tests to assess the effect of particular sets of ecosystem services in the matrices comparison.**

Matrices are Pearson correlations between ecosystem services including all factors and after subsequently removing the effects of environmental factors (E) and forest attributes (E+F). The first column is the comparison test, the next three columns correspond to the unscaled Chi-square ( $\chi^2$ ), and the next three give the Comparative Fit Index (CFI), Tucker-Lewis Index (TLI) and McDonald Measure of Centrality (Mc) after dropping a set of ES (significant differences in  $\chi^2$ , CFI and TLI values below 0.95, and Mc values below 0.90 indicate significant differences between matrices). The last column shows the number of times each comparison was significantly different for at least three of the indices after randomly dropping the same number of ecosystem services than the set assessed 1000 times.

|                                      | Comparison         | $\chi^2$ diff | DF | Pr(> $\chi^2$ ) | CFI   | TLI   | MC    | Significant random tests |
|--------------------------------------|--------------------|---------------|----|-----------------|-------|-------|-------|--------------------------|
| Dropping supporting services (n=5)   | E vs All factors   | 58.159        | 36 | 0.011           | 0.951 | 0.902 | 0.964 | 49                       |
|                                      | E+F vs All factors | 119.125       | 36 | 0.000           | 0.745 | 0.491 | 0.870 | 995                      |
|                                      | E+F vs E           | 81.963        | 36 | 0.000           | 0.764 | 0.529 | 0.926 | 0                        |
| Dropping regulating services (n=4)   | E vs All factors   | 89.249        | 45 | 0.000           | 0.872 | 0.744 | 0.929 | 37                       |
|                                      | E+F vs All factors | 139.360       | 45 | 0.000           | 0.725 | 0.450 | 0.854 | 959                      |
|                                      | E+F vs E           | 35.440        | 45 | 0.846           | 1.000 | 1.210 | 1.000 | 0                        |
| Dropping provisioning services (n=1) | E vs All factors   | 130.959       | 78 | 0.000           | 0.929 | 0.858 | 0.915 | 0                        |
|                                      | E+F vs All factors | 189.836       | 78 | 0.000           | 0.826 | 0.652 | 0.829 | 1000                     |
|                                      | E+F vs E           | 63.204        | 78 | 0.888           | 1.000 | 1.133 | 1.000 | 0                        |
| Dropping cultural services (n=4)     | E vs All factors   | 97.662        | 45 | 0.000           | 0.887 | 0.774 | 0.916 | 37                       |
|                                      | E+F vs All factors | 138.626       | 45 | 0.000           | 0.776 | 0.553 | 0.855 | 959                      |
|                                      | E+F vs E           | 57.769        | 45 | 0.096           | 0.914 | 0.828 | 0.979 | 0                        |

**Supplementary Table 5.** Estimated overall effects of forest attributes on ecosystem services obtained from full linear models. DF = Degrees of freedom. DBH = Diameter at breast height. Significance levels: \*\*\* $p \leq 0.001$ ; \*\* $p \leq 0.01$ ; \* $p \leq 0.05$ .

|                          | <b>Estimate</b> | <b>Std. Error</b> | <b>DF</b> | <b>t value</b> | <b>Pr(&gt; t )</b> | <b>Significance</b> |
|--------------------------|-----------------|-------------------|-----------|----------------|--------------------|---------------------|
| Intercept                | -0.001          | 0.017             | 1987      | -0.036         | 0.971              |                     |
| Shrub richness           | 0.047           | 0.026             | 1987      | 1.834          | 0.067              |                     |
| Tree richness            | 0.030           | 0.024             | 1987      | 1.262          | 0.207              |                     |
| Beech regeneration       | 0.018           | 0.023             | 1987      | 0.792          | 0.429              |                     |
| Conifer cover            | 0.077           | 0.031             | 1987      | 2.456          | 0.014              | *                   |
| Oak cover                | 0.021           | 0.022             | 1987      | 0.927          | 0.354              |                     |
| Mean DBH                 | 0.062           | 0.029             | 1987      | 2.157          | 0.031              | *                   |
| Deadwood volume          | -0.003          | 0.022             | 1987      | -0.124         | 0.901              |                     |
| Vertical heterogeneity   | 0.099           | 0.027             | 1987      | 3.733          | 0.000              | ***                 |
| Shrub evenness           | 0.006           | 0.024             | 1987      | 0.244          | 0.808              |                     |
| Tree evenness            | -0.005          | 0.021             | 1987      | -0.231         | 0.817              |                     |
| Horizontal heterogeneity | 0.018           | 0.025             | 1987      | 0.701          | 0.483              |                     |
| Canopy cover             | -0.007          | 0.027             | 1987      | -0.259         | 0.795              |                     |

**Supplementary Table 6. Estimated effects of 12 forest attributes on 14 ecosystem services obtained from simplified linear models.** Only those predictors retained after performing model simplification based on AIC are shown. Standard errors and *p*-values are also shown.

| <b>Ecosystem service</b> | <b>Predictor</b>         | <b>Estimate</b> | <b>Std. Error</b> | <b>Pr(&gt; t )</b> |
|--------------------------|--------------------------|-----------------|-------------------|--------------------|
| Root decomposition       | Intercept                | 0.014           | 0.059             | 0.817              |
| Root decomposition       | Mean DBH                 | 0.200           | 0.074             | 0.008              |
| Root decomposition       | Vertical heterogeneity   | -0.154          | 0.071             | 0.032              |
| Dung removal             | Intercept                | -0.002          | 0.055             | 0.968              |
| Dung removal             | Vertical heterogeneity   | 0.124           | 0.058             | 0.033              |
| P availability           | Intercept                | 0.003           | 0.044             | 0.944              |
| P availability           | Oak cover                | 0.168           | 0.049             | 0.001              |
| Pest control             | Intercept                | -0.061          | 0.052             | 0.244              |
| Pest control             | Conifer cover            | 0.424           | 0.074             | 0.000              |
| Pest control             | Horizontal heterogeneity | -0.286          | 0.068             | 0.000              |
| Pest control             | Canopy cover             | -0.158          | 0.068             | 0.023              |
| Pest control             | Shrub evenness           | 0.178           | 0.062             | 0.005              |
| Pest control             | Oak cover                | -0.143          | 0.061             | 0.021              |
| C storage in soils       | Intercept                | 0.001           | 0.060             | 0.987              |
| C storage in soils       | Beech regeneration       | -0.153          | 0.063             | 0.017              |
| Temperature regulation   | Intercept                | -0.004          | 0.049             | 0.933              |
| Temperature regulation   | Shrub richness           | -0.137          | 0.067             | 0.041              |
| Temperature regulation   | Oak cover                | -0.180          | 0.061             | 0.004              |
| Temperature regulation   | Conifer cover            | -0.250          | 0.076             | 0.001              |
| Temperature regulation   | Canopy cover             | 0.538           | 0.059             | 0.000              |
| C storage in trees       | Intercept                | 0.004           | 0.049             | 0.941              |
| C storage in trees       | Conifer cover            | -0.292          | 0.064             | 0.000              |
| C storage in trees       | Mean DBH                 | 0.358           | 0.066             | 0.000              |
| C storage in trees       | Canopy cover             | 0.225           | 0.065             | 0.001              |
| C storage in trees       | Vertical heterogeneity   | 0.374           | 0.072             | 0.000              |
| C storage in trees       | Tree evenness            | -0.150          | 0.054             | 0.006              |
| Timber production        | Intercept                | 0.020           | 0.054             | 0.713              |
| Timber production        | Canopy cover             | -0.219          | 0.073             | 0.003              |
| Timber production        | Conifer cover            | 0.829           | 0.074             | 0.000              |
| Timber production        | Mean DBH                 | -0.163          | 0.073             | 0.027              |
| Timber production        | Vertical heterogeneity   | 0.199           | 0.080             | 0.014              |
| Timber production        | Oak cover                | 0.172           | 0.065             | 0.009              |
| Edible fungi             | Intercept                | 0.011           | 0.059             | 0.851              |
| Edible fungi             | Tree richness            | 0.260           | 0.072             | 0.000              |
| Edible fungi             | Conifer cover            | -0.249          | 0.073             | 0.001              |
| Edible fungi             | Mean DBH                 | 0.246           | 0.072             | 0.001              |
| Wild edible plants       | Intercept                | 0.002           | 0.053             | 0.965              |
| Wild edible plants       | Shrub richness           | 0.621           | 0.072             | 0.000              |
| Wild edible plants       | Conifer cover            | 0.193           | 0.079             | 0.015              |
| Wild edible plants       | Vertical heterogeneity   | 0.247           | 0.065             | 0.000              |
| Wild edible plants       | Tree evenness            | -0.189          | 0.057             | 0.001              |
| Wild edible plants       | Canopy cover             | -0.298          | 0.069             | 0.000              |
| Plant cultural value     | Intercept                | -0.003          | 0.041             | 0.944              |
| Plant cultural value     | Shrub richness           | 0.296           | 0.055             | 0.000              |
| Plant cultural value     | Conifer cover            | -0.404          | 0.061             | 0.000              |
| Plant cultural value     | Oak cover                | -0.123          | 0.049             | 0.013              |



|                         |                          |        |       |       |
|-------------------------|--------------------------|--------|-------|-------|
| Plant cultural value    | Deadwood volume          | -0.096 | 0.047 | 0.044 |
| Plant cultural value    | Vertical heterogeneity   | 0.200  | 0.045 | 0.000 |
| Plant cultural value    | Horizontal heterogeneity | -0.109 | 0.049 | 0.028 |
| Bird-watching potential | Intercept                | 0.004  | 0.065 | 0.952 |
| Bird-watching potential | Beech regeneration       | 0.179  | 0.075 | 0.018 |
| Bird-watching potential | Oak cover                | 0.290  | 0.070 | 0.000 |
| Bird-watching potential | Mean DBH                 | 0.439  | 0.072 | 0.000 |
| Bird-watching potential | Canopy cover             | -0.202 | 0.074 | 0.007 |

---

**Supplementary Table 7. a) Comparison of the effects of conifer species identity in full linear models.**  
Standard errors, *p*-values and adjusted *p*-values are also shown.

| <b>Ecosystem service</b> | <b>Predictor</b> | <b>Estimate</b> | <b>Std. Error</b> | <b>Pr(&gt; t )</b> | <b>Adj. Pr(&gt; t )</b> |
|--------------------------|------------------|-----------------|-------------------|--------------------|-------------------------|
| Root decomposition       | Conifer cover    | 0.016           | 0.109             | 0.886              | 0.988                   |
| Root decomposition       | Spruce cover     | 0.188           | 0.174             | 0.287              | 0.842                   |
| Root decomposition       | Pine cover       | -0.008          | 0.172             | 0.962              | 0.989                   |
| Dung removal             | Conifer cover    | 0.089           | 0.102             | 0.385              | 0.792                   |
| Dung removal             | Spruce cover     | 0.483           | 0.208             | 0.025              | 0.414                   |
| Dung removal             | Pine cover       | 0.022           | 0.257             | 0.933              | 0.981                   |
| Mycorrhizal diversity    | Conifer cover    | 0.100           | 0.168             | 0.553              | 0.918                   |
| Mycorrhizal diversity    | Spruce cover     | 0.442           | 0.376             | 0.251              | 0.842                   |
| Mycorrhizal diversity    | Pine cover       | -0.563          | 0.400             | 0.170              | 0.552                   |
| N availability           | Conifer cover    | 0.161           | 0.094             | 0.089              | 0.356                   |
| N availability           | Spruce cover     | 0.043           | 0.151             | 0.776              | 0.935                   |
| N availability           | Pine cover       | -0.145          | 0.220             | 0.515              | 0.853                   |
| P availability           | Conifer cover    | 0.001           | 0.079             | 0.986              | 0.988                   |
| P availability           | Spruce cover     | -0.055          | 0.154             | 0.722              | 0.935                   |
| P availability           | Pine cover       | -0.290          | 0.243             | 0.242              | 0.629                   |
| Pest control             | Conifer cover    | 0.318           | 0.079             | 0.000              | 0.000                   |
| Pest control             | Spruce cover     | -0.147          | 0.159             | 0.362              | 0.891                   |
| Pest control             | Pine cover       | 0.729           | 0.298             | 0.020              | 0.250                   |
| C storage in soils       | Conifer cover    | 0.155           | 0.109             | 0.159              | 0.482                   |
| C storage in soils       | Spruce cover     | 0.242           | 0.278             | 0.389              | 0.908                   |
| C storage in soils       | Pine cover       | 0.206           | 0.412             | 0.621              | 0.853                   |
| C storage in trees       | Conifer cover    | -0.241          | 0.087             | 0.006              | 0.061                   |
| C storage in trees       | Spruce cover     | -0.165          | 0.144             | 0.257              | 0.842                   |
| C storage in trees       | Pine cover       | -0.361          | 0.113             | 0.003              | 0.091                   |
| Temperature regulation   | Conifer cover    | -0.175          | 0.090             | 0.054              | 0.266                   |
| Temperature regulation   | Spruce cover     | 0.092           | 0.202             | 0.650              | 0.935                   |
| Temperature regulation   | Pine cover       | -0.496          | 0.253             | 0.059              | 0.383                   |
| Timber production        | Conifer cover    | 0.921           | 0.097             | 0.000              | 0.000                   |
| Timber production        | Spruce cover     | 0.927           | 0.219             | 0.000              | 0.000                   |
| Timber production        | Pine cover       | -0.312          | 0.323             | 0.342              | 0.751                   |
| Edible fungi             | Conifer cover    | -0.158          | 0.108             | 0.145              | 0.481                   |
| Edible fungi             | Spruce cover     | -0.072          | 0.245             | 0.772              | 0.935                   |
| Edible fungi             | Pine cover       | -0.981          | 0.337             | 0.007              | 0.182                   |
| Wild edible plants       | Conifer cover    | 0.191           | 0.098             | 0.054              | 0.266                   |
| Wild edible plants       | Spruce cover     | 0.063           | 0.170             | 0.714              | 0.918                   |
| Wild edible plants       | Pine cover       | 0.506           | 0.254             | 0.056              | 0.364                   |
| Plant cultural value     | Conifer cover    | -0.404          | 0.074             | 0.000              | 0.000                   |
| Plant cultural value     | Spruce cover     | -0.139          | 0.160             | 0.388              | 0.908                   |
| Plant cultural value     | Pine cover       | -0.042          | 0.180             | 0.817              | 0.928                   |
| Bird-watching potential  | Conifer cover    | 0.074           | 0.115             | 0.521              | 0.878                   |
| Bird-watching potential  | Spruce cover     | -0.156          | 0.209             | 0.460              | 0.910                   |
| Bird-watching potential  | Pine cover       | -0.289          | 0.356             | 0.423              | 0.801                   |

**b) Comparison of the effects of broadleaved species identity in full linear models.** Standard errors,  $p$ -values and adjusted  $p$ -values are also shown.

| Ecosystem service       | Predictor   | Estimate | Std. Error | Pr(> t ) | Adj. Pr(> t ) |
|-------------------------|-------------|----------|------------|----------|---------------|
| Root decomposition      | Oak cover   | 0.114    | 0.146      | 0.437    | 0.810         |
| Root decomposition      | Beech cover | 0.093    | 0.244      | 0.704    | 0.908         |
| Dung removal            | Oak cover   | -0.191   | 0.117      | 0.104    | 0.474         |
| Dung removal            | Beech cover | -0.294   | 0.199      | 0.142    | 0.535         |
| Mycorrhizal diversity   | Oak cover   | -0.003   | 0.194      | 0.987    | 1.000         |
| Mycorrhizal diversity   | Beech cover | 0.553    | 0.338      | 0.107    | 0.477         |
| N availability          | Oak cover   | 0.198    | 0.112      | 0.081    | 0.397         |
| N availability          | Beech cover | 0.438    | 0.193      | 0.026    | 0.170         |
| P availability          | Oak cover   | 0.212    | 0.077      | 0.007    | 0.084         |
| P availability          | Beech cover | 0.115    | 0.131      | 0.381    | 0.754         |
| Pest control            | Oak cover   | -0.150   | 0.056      | 0.009    | 0.084         |
| Pest control            | Beech cover | -0.248   | 0.096      | 0.012    | 0.098         |
| C storage in soils      | Oak cover   | -0.184   | 0.118      | 0.122    | 0.498         |
| C storage in soils      | Beech cover | -0.313   | 0.199      | 0.119    | 0.498         |
| Temperature regulation  | Oak cover   | -0.107   | 0.103      | 0.299    | 0.689         |
| Temperature regulation  | Beech cover | 0.273    | 0.175      | 0.122    | 0.498         |
| C storage in trees      | Oak cover   | -0.064   | 0.116      | 0.579    | 0.866         |
| C storage in trees      | Beech cover | -0.024   | 0.197      | 0.902    | 1.000         |
| Timber production       | Oak cover   | 0.104    | 0.094      | 0.274    | 0.647         |
| Timber production       | Beech cover | 0.092    | 0.161      | 0.566    | 0.866         |
| Edible fungi            | Oak cover   | 0.213    | 0.106      | 0.048    | 0.277         |
| Edible fungi            | Beech cover | 0.251    | 0.182      | 0.171    | 0.568         |
| Wild edible plants      | Oak cover   | -0.031   | 0.121      | 0.800    | 0.996         |
| Wild edible plants      | Beech cover | -0.085   | 0.206      | 0.681    | 0.892         |
| Plant cultural value    | Oak cover   | -0.196   | 0.086      | 0.024    | 0.162         |
| Plant cultural value    | Beech cover | -0.143   | 0.146      | 0.329    | 0.711         |
| Bird-watching potential | Oak cover   | 0.271    | 0.138      | 0.052    | 0.289         |
| Bird-watching potential | Beech cover | 0.092    | 0.233      | 0.693    | 0.900         |

**c) Comparison of the effects removing overlapping species for wild edible plant species and shrubs richness and evenness in simplified models.**

| Dataset                             | Ecosystem service  | Predictor              | Estimate | Std. Error | Pr(> t ) |
|-------------------------------------|--------------------|------------------------|----------|------------|----------|
| <b>Original</b>                     | Wild edible plants | Intercept              | 0.002    | 0.053      | 0.965    |
|                                     | Wild edible plants | Shrub richness         | 0.621    | 0.072      | 0.000    |
|                                     | Wild edible plants | Conifer cover          | 0.193    | 0.079      | 0.015    |
|                                     | Wild edible plants | Vertical heterogeneity | 0.247    | 0.065      | 0.000    |
|                                     | Wild edible plants | Tree evenness          | -0.189   | 0.057      | 0.001    |
|                                     | Wild edible plants | Canopy cover           | -0.298   | 0.069      | 0.000    |
|                                     | Wild edible plants | Intercept              | 0.001    | 0.059      | 0.989    |
| <b>Removing overlapping species</b> | Wild edible plants | Shrub richness         | 0.439    | 0.077      | 0.000    |
|                                     | Wild edible plants | Conifer cover          | 0.346    | 0.083      | 0.000    |
|                                     | Wild edible plants | Vertical heterogeneity | 0.208    | 0.072      | 0.005    |
|                                     | Wild edible plants | Tree evenness          | -0.180   | 0.064      | 0.005    |
|                                     | Wild edible plants | Canopy cover           | -0.350   | 0.076      | 0.000    |

**d) Comparison of the effects removing overlapping species for wild edible plant species and shrubs richness and evenness in full models.**

| <b>Dataset</b>                      | <b>Ecosystem service</b> | <b>Predictor</b> | <b>Estimate</b> | <b>Std. Error</b> | <b>Pr(&gt; t )</b> | <b>Adj. Pr(&gt; t )</b> |
|-------------------------------------|--------------------------|------------------|-----------------|-------------------|--------------------|-------------------------|
| <b>Original</b>                     | Wild edible plants       | Intercept        | 0.002           | 0.054             | 0.971              | 0.988                   |
|                                     | Wild edible plants       | Shrub richness   | 0.641           | 0.079             | 0.000              | 0.000                   |
|                                     | Wild edible plants       | Tree richness    | -0.011          | 0.073             | 0.880              | 0.988                   |
|                                     |                          | Beech            |                 |                   |                    |                         |
|                                     | Wild edible plants       | regeneration     | -0.084          | 0.071             | 0.243              | 0.614                   |
|                                     | Wild edible plants       | Conifer cover    | 0.191           | 0.098             | 0.054              | 0.266                   |
|                                     | Wild edible plants       | Oak cover        | 0.033           | 0.070             | 0.644              | 0.948                   |
|                                     | Wild edible plants       | Mean DBH         | 0.062           | 0.089             | 0.486              | 0.842                   |
|                                     |                          | Deadwood         |                 |                   |                    |                         |
|                                     | Wild edible plants       | volume           | 0.008           | 0.067             | 0.905              | 0.988                   |
|                                     |                          | Vertical         |                 |                   |                    |                         |
|                                     | Wild edible plants       | heterogeneity    | 0.210           | 0.082             | 0.012              | 0.091                   |
|                                     | Wild edible plants       | Shrub evenness   | -0.064          | 0.074             | 0.389              | 0.800                   |
|                                     | Wild edible plants       | Tree evenness    | -0.186          | 0.064             | 0.005              | 0.051                   |
|                                     |                          | Horizontal       |                 |                   |                    |                         |
| <b>Removing overlapping species</b> | Wild edible plants       | heterogeneity    | -0.033          | 0.079             | 0.677              | 0.974                   |
|                                     | Wild edible plants       | Canopy cover     | -0.306          | 0.083             | 0.000              | 0.000                   |
|                                     | Wild edible plants       | Intercept        | 0.000           | 0.060             | 0.995              | 0.999                   |
|                                     | Wild edible plants       | Shrub richness   | 0.411           | 0.083             | 0.000              | 0.000                   |
|                                     | Wild edible plants       | Tree richness    | 0.069           | 0.080             | 0.392              | 0.779                   |
|                                     |                          | Beech            |                 |                   |                    |                         |
|                                     | Wild edible plants       | regeneration     | 0.007           | 0.078             | 0.930              | 0.999                   |
|                                     | Wild edible plants       | Conifer cover    | 0.331           | 0.108             | 0.003              | 0.030                   |
|                                     | Wild edible plants       | Oak cover        | 0.045           | 0.079             | 0.575              | 0.908                   |
|                                     | Wild edible plants       | Mean DBH         | 0.146           | 0.098             | 0.137              | 0.475                   |
|                                     |                          | Deadwood         |                 |                   |                    |                         |
|                                     | Wild edible plants       | volume           | 0.053           | 0.074             | 0.471              | 0.824                   |
|                                     |                          | Vertical         |                 |                   |                    |                         |
|                                     | Wild edible plants       | heterogeneity    | 0.169           | 0.091             | 0.066              | 0.286                   |
|                                     | Wild edible plants       | Shrub evenness   | 0.086           | 0.091             | 0.342              | 0.732                   |
|                                     | Wild edible plants       | Tree evenness    | -0.191          | 0.071             | 0.008              | 0.066                   |
|                                     |                          | Horizontal       |                 |                   |                    |                         |
|                                     | Wild edible plants       | heterogeneity    | -0.055          | 0.088             | 0.529              | 0.867                   |
|                                     | Wild edible plants       | Canopy cover     | -0.368          | 0.091             | 0.000              | 0.000                   |

**Table 8.  $R^2$ , adjusted  $R^2$ , F-statistics and degrees of freedom (DF) for each of the 14 ecosystem service models. Metrics for both full and simplified models are shown.**

| <b>Ecosystem services</b> | <b>Full models</b>      |                              |                    |           | <b>Simplified models</b> |                              |                    |           |
|---------------------------|-------------------------|------------------------------|--------------------|-----------|--------------------------|------------------------------|--------------------|-----------|
|                           | <b><math>R^2</math></b> | <b>Adj. <math>R^2</math></b> | <b>F-statistic</b> | <b>DF</b> | <b><math>R^2</math></b>  | <b>Adj. <math>R^2</math></b> | <b>F-statistic</b> | <b>DF</b> |
| Root decomposition        | 0.074                   | -0.019                       | 0.799              | 120       | 0.060                    | 0.046                        | 4.178              | 130       |
| Dung removal              | 0.079                   | -0.003                       | 0.968              | 135       | 0.031                    | 0.024                        | 4.638              | 146       |
| P availability            | 0.174                   | 0.101                        | 2.372              | 135       | 0.075                    | 0.069                        | 11.908             | 146       |
| N availability            | 0.080                   | -0.003                       | 0.959              | 132       | 0.000                    | 0.000                        | -                  | -         |
| Mycorrhizal diversity     | 0.117                   | 0.006                        | 1.056              | 96        | 0.000                    | 0.000                        | -                  | -         |
| Pest control              | 0.540                   | 0.498                        | 13.084             | 134       | 0.600                    | 0.581                        | 30.659             | 102       |
| Temperature regulation    | 0.472                   | 0.425                        | 10.054             | 135       | 0.437                    | 0.421                        | 27.767             | 143       |
| C storage in soil         | 0.092                   | 0.009                        | 1.104              | 130       | 0.041                    | 0.034                        | 5.840              | 138       |
| C storage in trees        | 0.658                   | 0.627                        | 21.606             | 135       | 0.633                    | 0.620                        | 48.552             | 141       |
| Timber production         | 0.530                   | 0.488                        | 12.687             | 135       | 0.514                    | 0.496                        | 28.998             | 137       |
| Edible fungi              | 0.281                   | 0.213                        | 4.161              | 128       | 0.217                    | 0.200                        | 12.671             | 137       |
| Wild edible plants        | 0.529                   | 0.487                        | 12.645             | 135       | 0.520                    | 0.503                        | 30.710             | 142       |
| Plant cultural value      | 0.312                   | 0.251                        | 5.107              | 135       | 0.343                    | 0.315                        | 12.266             | 141       |
| Bird-watching potential   | 0.424                   | 0.372                        | 8.165              | 133       | 0.397                    | 0.379                        | 22.071             | 134       |

**Supplementary Table 9. List of edible fungi species identified in the 150 forest plots.**

| <b>Edible fungi species</b>     |
|---------------------------------|
| <i>Amanita rubescens</i>        |
| <i>Boletus edulis</i>           |
| <i>Chlorophyllum olivieri</i>   |
| <i>Cortinarius stillatitius</i> |
| <i>Hydnum rufescens</i>         |
| <i>Hygrophorus discoideus</i>   |
| <i>Hygrophorus poetarum</i>     |
| <i>Laccaria amethystina</i>     |
| <i>Laccaria laccata</i>         |
| <i>Lycoperdon perlatum</i>      |
| <i>Macrolepiota procera</i>     |
| <i>Pluteus cervinus</i>         |
| <i>Psathyrella piluliformis</i> |
| <i>Russula cyanoxantha</i>      |
| <i>Russula decolorans</i>       |
| <i>Russula heterophylla</i>     |
| <i>Russula integra</i>          |
| <i>Russula paludosa</i>         |
| <i>Russula vesca</i>            |
| <i>Russula virescens</i>        |
| <i>Tricholoma columbetta</i>    |
| <i>Tricholoma orirubens</i>     |
| <i>Xerocomus pruinatus</i>      |

**Supplementary Table 10. List of wild edible plants species for potential gathering found in the 150 forest plots and their average percentage of cover across plots.**

| <b>Wild edible plant species</b>          | <b>Cover (%)</b> |
|-------------------------------------------|------------------|
| <i>Aegopodium podagraria</i>              | 0.353            |
| <i>Allium ursinum</i>                     | 0.597            |
| <i>Corylus avellana</i>                   | 0.177            |
| <i>Fragaria vesca</i>                     | 0.727            |
| <i>Galium odoratum</i>                    | 3.321            |
| <i>Hypericum hirsutum</i>                 | 0.057            |
| <i>Hypericum maculatum</i>                | 0.023            |
| <i>Hypericum montanum</i>                 | 0.023            |
| <i>Hypericum perforatum</i>               | 0.052            |
| <i>Juniperus communis</i>                 | 0.007            |
| <i>Malus sp.</i>                          | 0.009            |
| <i>Prunus avium</i>                       | 0.044            |
| <i>Prunus padus</i>                       | 0.020            |
| <i>Prunus spinosa</i>                     | 0.047            |
| <i>Pyrus communis</i>                     | 0.003            |
| <i>Ribes alpinum</i>                      | 0.003            |
| <i>Ribes uva-crispa</i>                   | 0.020            |
| <i>Rubus fruticosus-corylifolius agg.</i> | 1.341            |
| <i>Rubus idaeus</i>                       | 4.200            |
| <i>Sambucus nigra</i>                     | 0.561            |
| <i>Sorbus aria</i>                        | 0.037            |
| <i>Sorbus aucuparia</i>                   | 0.267            |
| <i>Sorbus torminalis</i>                  | 0.003            |
| <i>Vaccinium myrtillus</i>                | 0.331            |

**Supplementary Table 11. List of plant species of special interest (i.e. of cultural value) found in the 150 forest plots and their average percentage of cover across plots.**

| <b>Plant species of cultural value</b> | <b>Cover (%)</b> |
|----------------------------------------|------------------|
| <i>Alliaria petiolata</i>              | 0.094            |
| <i>Allium ursinum</i>                  | 0.597            |
| <i>Anemone nemorosa</i>                | 20.549           |
| <i>Anemone ranunculoides</i>           | 0.780            |
| <i>Arum maculatum</i>                  | 0.121            |
| <i>Asarum europaeum</i>                | 1.120            |
| <i>Campanula patula</i>                | 0.003            |
| <i>Campanula rotundifolia</i>          | 0.003            |
| <i>Campanula trachelium</i>            | 0.043            |
| <i>Cardamine bulbifera</i>             | 0.980            |
| <i>Cephalanthera damasonium</i>        | 0.025            |
| <i>Cephalanthera rubra</i>             | 0.007            |
| <i>Chrysosplenium alternifolium</i>    | 0.007            |
| <i>Colchicum autumnale</i>             | 0.003            |
| <i>Convallaria majalis</i>             | 0.044            |
| <i>Daphne mezereum</i>                 | 0.062            |
| <i>Digitalis purpurea</i>              | 0.001            |
| <i>Epilobium angustifolium</i>         | 0.075            |
| <i>Euphorbia amygdaloides</i>          | 0.040            |
| <i>Euphorbia cyparissias</i>           | 0.054            |
| <i>Galium odoratum</i>                 | 3.321            |
| <i>Geum urbanum</i>                    | 0.270            |
| <i>Helleborus foetidus</i>             | 0.011            |
| <i>Hepatica nobilis</i>                | 0.017            |
| <i>Lamium galeobdolon</i> agg.         | 2.177            |
| <i>Lathraea squamaria</i>              | 0.007            |
| <i>Lathyrus vernus</i>                 | 0.231            |
| <i>Lilium martagon</i>                 | 0.028            |
| <i>Listera ovata</i>                   | 0.007            |
| <i>Maianthemum bifolium</i>            | 0.014            |
| <i>Malus</i> sp.                       | 0.009            |
| <i>Mercurialis perennis</i>            | 4.443            |
| <i>Paris quadrifolia</i>               | 0.171            |
| <i>Polygonatum multiflorum</i>         | 0.051            |
| <i>Polygonatum odoratum</i>            | 0.001            |
| <i>Polygonatum verticillatum</i>       | 0.144            |
| <i>Primula elatior</i> veris agg.      | 0.132            |
| <i>Prunus avium</i>                    | 0.044            |
| <i>Pulmonaria obscura</i>              | 0.093            |
| <i>Ranunculus ficaria</i>              | 1.747            |
| <i>Ranunculus lanuginosus</i>          | 0.040            |
| <i>Sorbus aria</i>                     | 0.037            |
| <i>Sorbus aucuparia</i>                | 0.267            |
| <i>Sorbus torminalis</i>               | 0.003            |
| <i>Viburnum lantana</i>                | 0.003            |
| <i>Viburnum opulus</i>                 | 0.007            |
| <i>Vincetoxicum hirundinaria</i>       | 0.003            |



## Supplementary Methods.

### Ecosystem service measurement

In each of the 150 forest plots we assessed proxies for 14 ecosystem services. Most soil ecosystem services (i.e., P availability, N availability, C storage in soils, mycorrhizal diversity and edible fungi) were sampled in a joint soil sampling campaign that collected 14 samples of the upper 10 cm of the mineral soil in each of 150 plots along two 40 m long transects using cores with a diameter of 5 cm. The joint soil sampling campaign took place in May 2011 and May 2014. In each campaign, the 14 soil samples were mixed into a composite sample before further analysis. Roots were used for the determination of the associated fungal species richness by pyrosequencing and identification of mycorrhizal fungi by a standard procedure (ITS2 sequencing and accepting species names at the 97 per cent level of identity with species in UNITE or NCBI databases)<sup>1</sup>. Cultural services based on plant records (i.e., wild edible plants and plant species of special cultural value) were sampled during a vegetation survey of a 400 m<sup>2</sup> subplot in each of the 150 plots in 2011. Cover of each plant species was estimated across four different vegetation layers (herbs, shrubs <5m, trees 5 – 10 m, trees > 10 m), and the sum of the cover per plant species across vegetation layers was used to estimate proxies of the ecosystem services described below.

Because the proxies for each of the different services represent different time frames, we have included data collected in the closest available dates (e.g. most soil, plants and temperature data were collected in 2011). In other cases, values were available to represent a rotation period (e.g. timber production). In any case, we consider these proxies as snap-shot measures of a particular time-period and acknowledge that values could change over time.

Description of the methods used to measure each ecosystem service proxy:

*Root decomposition.* Fine root decomposition plays an important role in element cycling in forest ecosystems<sup>2</sup>. We measured decomposition of fine roots (<2 mm) within the upper 10 cm of the mineral soil. Three polyester litterbags per plot, with a mesh size of 100 micrometers, were filled with fine roots collected from 2 year old European beech (*Fagus sylvatica* L.). These were buried in each of the 150 plots in October 2011 and were then harvested after 12 months in October 2012. We used the percentage of root litter mass loss as a proxy of decomposition<sup>3</sup>.

*Dung removal.* Dung beetle communities contribute to the rapid decomposition of fecal deposits from both wild mammals and domestic livestock, representing a key ecosystem service<sup>4</sup>. We installed five dung piles (cow, sheep, horse, wild boar, red deer) on each 150 plots and collected the remaining dung after 48 hours. The average percentage of dung dry mass removed (mostly by tunneling dung beetles) was used as indicator of dung removal rates<sup>4</sup>.

*P availability.* Phosphorus (P) can be a limiting element for plant growth and therefore can limit the functioning of the ecosystem<sup>5,6</sup>. We investigated the availability of P in forest soils by collecting soil samples as described above. Available P was extracted with 0.5M NaHCO<sub>3</sub> (pH = 8.5) following the Olsen methodology<sup>7</sup> and measured with Inductively Coupled Plasma/Optical Emission and Spectrometry (ICP-OES, PerkinElmer Optima 5300 DV, S10 auto sampler).

*N availability.* Nitrogen (N) can be a limiting element for plant growth and therefore can limit the functioning of the ecosystem<sup>8,9</sup>. We investigated the nitrification process in forest soils in terms of potential nitrification activity associated with N availability. Soil samples were collected during the joint campaign as described above. Potential nitrification measures were derived from the abundance of nitrifying bacteria following ref<sup>10</sup> and were used as a proxy of soil N availability<sup>11,12</sup>.

*Mycorrhizal diversity.* Higher species richness of mycorrhizal communities has been associated with higher functional diversity<sup>13</sup> and therefore higher rates of water and nutrient uptake<sup>13–15</sup>, pathogen protection<sup>16</sup>, and enzyme production<sup>17</sup>. We sampled the fungal community associated with roots following the abovementioned description of the joint soil campaign. The number of mycorrhizal operational taxonomic units (OTU) was used as a proxy of mycorrhizal diversity.

*Pest control.* Pest control is an important forest ecosystem service that can have an effect on other services like production of quality timber and aesthetic value<sup>18,19</sup>. We assessed the abundance of potential pest species

on ambrosia beetles (i.e. bark beetles, an important pest in forests<sup>20</sup>), together with their antagonists. We selected ambrosia beetles within the tribe Xyleborini because they comprise generalist species that are all found in conifer as well as broadleaved forests with some showing preference either for broadleaved (e.g. *Trypodendron domesticum* (L. 1758)) or conifer (e.g. *Trypodendron lineatum* (Oliv. 1795)) trees. All species share antagonists among predators and parasitoids. We assessed bark beetle and antagonists abundance by pheromone traps using a bottle trap. Lineatin lures and ethanol were used as attractants for bark beetles and their antagonists. Traps were emptied every second day during the main flight activity of the beetles and in weekly to monthly intervals afterwards. We standardized the data based on the method proposed by<sup>21</sup>. We only considered bark beetles that are attracted by lineatin or ethanol (i.e. species within the tribe Xyleborini) and predators and parasitoids that are mentioned as antagonists of Xyleborini in the literature<sup>22</sup>. Predator-prey ratios have been frequently used as measure of pest control potential in different systems<sup>23–25</sup>. The ratio between the sum of predators and parasitoids vs. bark beetles was used as a proxy of pest control (i.e. (Predators + Parasitoids) / (Bark beetles)). **Temperature regulation.** Forests buffer extreme temperatures due to canopy cover<sup>26</sup>. We collected data on air temperature 2 m above ground from climatic stations installed in each of the 150 plots. Diurnal temperature ranges (DTR) were calculated as differences between daily maximum and minimum temperature values<sup>27</sup>. Missing data was interpolated from surrounding stations. The inverse value of the average DTR per plot (DTR<sup>-1</sup>) was used as indicator to facilitate the interpretation of the results, so higher values of the indicator mean higher temperature regulation of the forest plot<sup>28</sup>.

**C storage in soils.** Forest soils contain important carbon pools. To estimate the amounts of carbon stored in forest topsoils, we followed the abovementioned description of the joint soil sampling campaign. An aliquot of <2 mm sieved soil was homogenized with a ball mill (RETSCH MM200, Retsch, Haan, Germany) and used to determine total C concentrations by dry combustion in an elemental analyser (VarioMax, Hanau, Germany). Inorganic carbon was determined after combustion of organic carbon at 450 °C for 16 h using the same elemental analyser and total organic carbon was afterwards determined from the difference between total and inorganic carbon. Organic carbon stocks were determined by multiplying organic carbon concentrations with the total soil mass (0–10 cm) per unit area (<2 mm) per m<sup>2</sup> at each site.

**C storage in trees.** Trees are also important carbon sinks, as they store carbon in their tissues via photosynthesis. To assess the amount of carbon stored in trees in each of the 150 plots, we estimated the living tree volume of each plot<sup>29</sup>. Dry biomass was estimated using the conversion factor of 0.43 for plots dominated by spruce, 0.49 for plots dominated by pine, 0.66 for plots dominated by oak and 0.68 for plots dominated by beech, according to ref<sup>30</sup>. The carbon stored in trees is approximately 50% of its dry biomass<sup>31</sup>.

**Timber production.** Timber is one of the main products extracted from forests.

We quantified timber production of each 150 plots as mean annual increment (MAI) across rotation (i.e. culmination of MAI) for even-aged forests and as periodic annual increment (PAI) between two forest inventories for uneven-aged and unmanaged forests. MAI was estimated based on site class or site maps of forest administrations. Culmination of MAI is estimated on 70 years to 100 years for *Picea abies*, 70 years to 90 years for *Pinus sylvestris*, 110 years to 130 for *Quercus* sp., and 160 years for *Fagus sylvatica*. PAI was estimated as the difference between the increment measured during the first forest inventory (2008 - 2011) and the second forest inventory (2015 - 2016) of our plots divided by the time span in years. All values are given as volume above bark (> 7 cm in diameter) in m<sup>3</sup> ha<sup>-1</sup> a<sup>-1</sup>.

**Edible fungi.** Mushroom collection or observation is common in forests, and is an important recreational activity considered as a cultural service<sup>32,33</sup>. We estimated the potential of our forests to harbor edible fungi by analyzing fungal species pools in forest soils following the abovementioned description of the joint soil campaign. Edible fungi were identified following the criteria of the German Mycological Society, excluding those species with inconsistent edible value<sup>34</sup>. We used species richness of the edible fungi as a proxy of potential observation of edible fungi (See complete list in Supplementary Table 9).

**Wild edible plants.** A recreational use of the forests is the collection of fruits, nuts, berries and medicinal plants for non-commercial use<sup>35</sup>. We estimated the potential recreational interest of forest plots following the methods for plant-based cultural services described above. Based on expert knowledge, we identified wild edible plant species known to be collected in the forest plots. Total cover of these species was used as a proxy of potential gathering of wild edible plants (See complete list in Supplementary Table 10).

**Plants of cultural value.** Forests harbor a great variety of plants, many of which are of special interest for botanists and education, such as the forest specialists *Helleborus* spp., *Asarum europaeum*, or *Galium odoratum*<sup>36</sup>, or are species blooming in early spring appreciated for their aesthetic value<sup>37</sup>, such as *Anemone nemorosa* and *Allium ursinum*. We recorded all plant species following the abovementioned method

description for plant-based cultural services. Plant species of special interest for the general public or for botanists were identified by botanists from the Botanical Society of Bern (Bernische Botanische Gesellschaft) with knowledge on people preferences. Total cover of these species was used as a proxy of potential plant cultural value (See complete list in Supplementary Table 11).

**Bird-watching potential.** Forests provide recreational opportunities for those interested in bird-watching. To estimate the bird-watching potential of forests plots, we performed five bird surveys during breeding times (March to June 2011) counting the number of individuals seen or heard during 5 minutes at the center of each plot<sup>38</sup>. Bird species richness was used as a proxy for bird watching potential.

### Forest attributes

We performed forest inventories from 2008 to 2011 to measure forest attributes in each of the 150 plots. We first selected 21 forest attributes, which represent the variation in forest management between stands and which we can expect to be linked to our ecosystem service measures. These included several measures of structure, composition, heterogeneity, diversity, regeneration and deadwood content of the forests (Supplementary Fig. 3). To avoid fitting correlated explanatory variables we tested for multi-collinearity based on variance inflation factors (VIF) using the `corvif` function in R<sup>39</sup>, with a threshold of 3<sup>40</sup>. After this procedure, 12 forest attributes were selected, which represent unique stand characteristics related to structure (mean DBH, canopy cover), composition (conifer and oak cover), heterogeneity (vertical and horizontal), diversity (tree richness and evenness, shrub richness and evenness), regeneration of native species (beech regeneration) and deadwood volume.

Description of the methods used to measure each of the 12 forest attributes selected:

**Canopy cover.** The percentage of each plot covered by tree crowns was estimated from the total crown projection area of all trees (DBH >7 cm) in a plot.

**Mean diameter at breast height (DBH).** Average DBH of the plot (only trees with DBH >7 cm were measured), which is closely related to the stand age.

**Conifer cover.** Percentage of total DBH comprised of non-native or planted conifer species (i.e. *Pinus sylvestris*, *Picea abies*, *Larix sp.*, *Abies alba*, *Pseudotsuga menziesii*, as sorted by cover).

**Oak cover.** Percentage of total DBH comprised by all *Quercus* species. Including the cover of both oak and conifers in the analysis represents the variation in tree species composition between the stands. The effect of conifer cover represents the difference between broadleaved and conifer dominated stands and the effect of oak cover additionally represents the difference between beech and oak dominated stands (note that we could not additionally include beech cover directly in the models as it would be highly negatively correlated with oak and conifer cover).

**Vertical heterogeneity.** The number of layers in the vertical axis of each forest plot was measured using terrestrial LiDAR laser scans. We used a laser-beam density of 44.4 Million beams per scan to obtain 3D point clouds using Faro Focus 3D (Faro Technologies Inc., Lake Marry, USA). We performed nine scans per plot, systematically distributed in the centre, east, north-east, north, north-west, west, south-west, south and south-east, respectively. The resulting three-dimensional point clouds were stratified into layers of one meter thickness. We calculated the inverse of the Simpson index as an indicator of forest vertical heterogeneity using the number of canopy layers that are effectively occupied by foliage and woody component from the total number of layers<sup>41</sup>. Larger index values reflect a more even occupation of layers by foliage along the vertical axis as well as greater stand height.

**Horizontal heterogeneity.** Standard deviation of canopy height using 25 cells, each of 400 m<sup>2</sup> per hectare (i.e., per plot). We used an airborne full-wave Riegl LMS-Q 560 scanner (Riegl Laser Measurement Systems GmbH, Horn, Austria), with a sampling accuracy of 50 cm for the LiDAR data<sup>42</sup>. This indicator characterises horizontal heterogeneity in terms of patchiness without being sensitive to fine-grained heterogeneity of the canopy surface due to cell size.

**Tree richness.** We estimated the number of tree species, from individuals above 5 m high, based on vegetation surveys performed in 400 m<sup>2</sup> of each of the 150 plots in 2011.

**Tree evenness.** We estimated the evenness of tree species, above 5 m height, based on vegetation surveys performed in 400 m<sup>2</sup> plots in 2011. Pielou's index ( $J'$ ) was used to calculate a measure of evenness uncorrelated with species richness, which ranges between 0 and 1.

**Shrub richness.** We estimated the species richness of the woody vegetation below 5 m in height, based on

vegetation surveys performed in 400 m<sup>2</sup> plots in 2011.

*Shrub evenness.* We estimated the Pielou evenness ( $J'$ ) of the woody vegetation below 5 m in height, based on vegetation surveys performed in 400 m<sup>2</sup> plots in 2011.

*Beech regeneration.* We estimated the cover of beech (*Fagus sylvatica*) below 5 m in height based on vegetation surveys performed in 400 m<sup>2</sup> plots in 2011.

*Deadwood volume.* We measured total deadwood volume, including downed and standing items larger than 25 cm and stumps larger than 7cm<sup>29</sup>.

### **Environmental factors**

*Location.* Each of the three regions covered by the Biodiversity Exploratories. This factor includes regional effects of climate, land use history, soil texture and elevation, amongst others.

*Slope.* We estimated the slope of each of the 150 plots using second-order finite differences<sup>43,44</sup> based on digital terrain models (DTM) and averaging values for each plot<sup>42</sup>.

*Soil depth.* We determined soil depth by sampling a soil core in the centre of all 150 plots in 2009. We used a motor-driven soil-column cylinder with a diameter of 8.3 cm for the soil sampling (Eijkelkamp, Giesbeek, The Netherlands). The combined thickness of all topsoil and subsoil horizons was used as a proxy of soil depth.

*Soil pH.* We collected soil samples following the abovementioned description of the 2011 joint soil-sampling campaign. pH was determined as the average value of two measurements based on 0.01M CaCl<sub>2</sub> with a soil solution ratio of 1:2.5.

## Supplementary References

1. Goldmann, K. *et al.* Divergent habitat filtering of root and soil fungal communities in temperate beech forests. *Sci. Rep.* **6**, (2016).
2. Hobbie, S. E. Effects of plant species on nutrient cycling. *Trends Ecol. Evol.* **7**, 336–339 (1992).
3. Solly, E. F. *et al.* Factors controlling decomposition rates of fine root litter in temperate forests and grasslands. *Plant Soil* **382**, 203–218 (2014).
4. Frank, K., Hülsmann, M., Assmann, T., Schmitt, T. & Blüthgen, N. Land use affects dung beetle communities and their ecosystem service in forests and grasslands. *Agric. Ecosyst. Environ.* **243**, 114–122 (2017).
5. Vitousek, P. M., Porder, S., Houlton, B. Z. & Chadwick, O. A. Terrestrial phosphorus limitation: mechanisms, implications, and nitrogen–phosphorus interactions. *Ecol. Appl.* **20**, 5–15 (2010).
6. Lang, F. *et al.* Soil phosphorus supply controls P nutrition strategies of beech forest ecosystems in Central Europe. *Biogeochemistry* **136**, 5–29 (2017).
7. Olsen, S. R., Cole, C. V., Watanabe, F. S. & Dean, L. A. *Estimation of available phosphorus in soils by extraction with sodium bicarbonate*. **939:1–19.**, (Gov. Printing Office, 1954).
8. Vitousek, P. M. & Howarth, R. Nitrogen limitation on land and in the sea: how can it occur? *Biogeochemistry* 13:87-115. *Biogeochemistry* **13**, 87–115 (1991).
9. LeBauer, D. S. & Treseder, K. K. Nitrogen Limitation of Net Primary Productivity in Terrestrial Ecosystems Is Globally Distributed. *Ecology* **89**, 371–379 (2008).
10. Hoffmann, H., Schlöter, M. & Wilke, B.-M. Microscale-scale measurement of potential nitrification rates of soil aggregates. *Biol. Fertil. Soils* **44**, 411–413 (2007).
11. Allan, E. *et al.* Land use intensification alters ecosystem multifunctionality via loss of biodiversity and changes to functional composition. *Ecol. Lett.* **18**, 834–843 (2015).
12. Soliveres, S. *et al.* Biodiversity at multiple trophic levels is needed for ecosystem multifunctionality. *Nature* **536**, 456–459 (2016).
13. Courty, P.-E. *et al.* The role of ectomycorrhizal communities in forest ecosystem processes: New perspectives and emerging concepts. *Soil Biol. Biochem.* **42**, 679–698 (2010).

14. Pena, R. & Polle, A. Attributing functions to ectomycorrhizal fungal identities in assemblages for nitrogen acquisition under stress. *ISME J.* **8**, 321–330 (2014).
15. Pena, R., Tejedor, J., Zeller, B., Dannenmann, M. & Polle, A. Interspecific temporal and spatial differences in the acquisition of litter-derived nitrogen by ectomycorrhizal fungal assemblages. *New Phytol.* **199**, 520–528 (2013).
16. Graham, J. H. What do root pathogens see in mycorrhizas? *New Phytol.* **149**, 357–359 (2001).
17. Buée, M., Courty, P.-E., Mignot, D. & Garbaye, J. Soil niche effect on species diversity and catabolic activities in an ectomycorrhizal fungal community. *Soil Biol. Biochem.* **39**, 39, (2007).
18. Jactel, H. *et al.* The influences of forest stand management on biotic and abiotic risks of damage. *Ann. For. Sci.* **66**, 701–701 (2009).
19. Bengtsson, J. Biological control as an ecosystem service: partitioning contributions of nature and human inputs to yield: Ecosystem services and human inputs. *Ecol. Entomol.* **40**, 45–55 (2015).
20. Raffa, K. F. *et al.* Cross-scale Drivers of Natural Disturbances Prone to Anthropogenic Amplification: The Dynamics of Bark Beetle Eruptions. *BioScience* **58**, 501–517 (2008).
21. Grégoire, J.-C., Piel, F., Proft, M. D. & Gilbert, M. Spatial Distribution of Ambrosia-Beetle Catches: A Possibly Useful Knowledge to Improve Mass-Trapping. *Integr. Pest Manag. Rev.* **6**, 237–242 (2001).
22. Kenis, M., Wermelinger, B. & Grégoire, J.-C. Research on Parasitoids and Predators of Scolytidae – A Review. in *Bark and Wood Boring Insects in Living Trees in Europe, a Synthesis* 237–290 (Springer, Dordrecht, 2007). doi:10.1007/978-1-4020-2241-8\_11
23. Klein, A.-M., Steffan-Dewenter, I. & Tscharntke, T. Predator–prey ratios on cocoa along a land-use gradient in Indonesia. *Biodivers. Conserv.* **11**, 683–693 (2002).
24. Bianchi, F. J. J. A., Schellhorn, N. A. & Cunningham, S. A. Habitat functionality for the ecosystem service of pest control: reproduction and feeding sites of pests and natural enemies. *Agric. For. Entomol.* **15**, 12–23 (2013).
25. Werf, W. van der, Nyrop, J. P. & Hardman, J. M. Sampling predator/prey ratios to predict cumulative pest density in the mite - predatory mite system *Panonychus ulmi* - *Typhlodromus pyri* in apples. *Appl. Biol.* **37**, 41–51 (1994).

26. Frey, S. J. K. *et al.* Spatial models reveal the microclimatic buffering capacity of old-growth forests. *Sci. Adv.* **2**, e1501392–e1501392 (2016).
27. Scheitlin, K. N. & Dixon, P. G. Diurnal Temperature Range Variability due to Land Cover and Airmass Types in the Southeast. *J. Appl. Meteorol. Climatol.* **49**, 879–888 (2009).
28. Felipe-Lucia, M. R., Comín, F. A. & Bennett, E. M. Interactions Among Ecosystem Services Across Land Uses in a Floodplain Agroecosystem. *Ecol. Soc.* **19**, (2014).
29. Kahl, T. & Bauhus, J. An index of forest management intensity based on assessment of harvested tree volume, tree species composition and dead wood origin. *Nat. Conserv.* **7**, 15–27 (2014).
30. Lohmann, U. *Holz-Handbuch*. (DRW-Verlag, 2012).
31. Intergovernmental Panel on Climate Change (IPCC). Good Practice Guidance for Land Use, Land-Use Change and Forestry. (2003).
32. CICES. Towards a common classification of ecosystem services. CICES V4.3. (2016).
33. Millennium Ecosystem Assessment. *Ecosystems and Human Well-Being: Our Human Planet: Summary for Decision Makers*. (Island Press, 2005).
34. Deutsche Gesellschaft für Mykologie e.V. Speisepilze. (2015). Available at: <https://www.dgfm-ev.de/speise-und-giftpilze/Speisepilze>. (Accessed: 9th April 2018)
35. Gamfeldt, L. *et al.* Higher levels of multiple ecosystem services are found in forests with more tree species. *Nat. Commun.* **4**, 1340 (2013).
36. Schmidt, M., Kriebitzsch, W.-U. & Ewald, J. *Waldartenlisten der Farn- und Blütenpflanzen, Moose und Flechten Deutschlands*. (Bundesamt für Naturschutz (BfN), 2011).
37. Bhattacharya, D. K., Ghosh, A. & de Castro, F. Cultural Services. *Ecosyst. Hum. Well- Policy Responses Find. Responses Work. Group* **3**, 401 (2005).
38. Renner, S. C. *et al.* Temporal Changes in Randomness of Bird Communities across Central Europe. *PLOS ONE* **9**, e112347 (2014).
39. R Development Core Team. *R: A language and environment for statistical computing*. (R Foundation for Statistical Computing, 2016).
40. Zuur, A. F. *Mixed effects models and extensions in ecology with R*. (Springer, 2009).

41. Ehbrecht, M., Schall, P., Juchheim, J., Ammer, C. & Seidel, D. Effective number of layers: A new measure for quantifying three-dimensional stand structure based on sampling with terrestrial LiDAR. *For. Ecol. Manag. Complete*, 212–223 (2016).
42. Nieschulze, J., Zimmermann, R., Börner, A. & Schulze, E. D. An assessment of forest canopy structure by LiDAR: Derivation and stability of canopy structure parameters across forest management types. *Forstarchiv* **83**, 195–209 (2012).
43. Ritter, P. A vector-based slope and aspect generation algorithm. *Photogramm. Eng. Remote Sens.* **53**, 1109–1111 (1987).
44. Zhou, Q. & Liu, X. Analysis of errors of derived slope and aspect related to DEM data properties. *Comput. Geosci.* **30**, 369–378 (2004).
